# Supplementary material for: Chlorination versus hydroxylation selectivity mediated by the non-heme iron halogenase WelO5
Source: Royal Society of Chemistry journal article supplement (doi:10.1039/d0cp00791a), 2020-01-01
Supplement: d0cp00791a1.pdf [file d0cp00791a1.pdf]

## Section 1: System setup with CHARMM software

### 1. Protonation scheme:

All Glu residues and Asp residues are deprotonated.

The  $\delta$ -N atom (HSD) protonated histidine residues correspond to residues numbered: 154, 249

The  $\epsilon$ -N atom (HSE) protonated histidine residues correspond to residues numbered: 3, 77, 119, 167

### 2. Active residues during geometry optimization:

The active region in QM/MM calculations:

LEU2 PHE4 ILE19 ILE22 ILE23 ARG26 ASP29 GLY30 MET31 ILE32 ILE33 LEU61  
ASN62 ASN64 PHE67 THR69 LYS70 VAL71 ALA72 GLN73 ILE74 TYR75 GLY76  
HSE77 ALA78 ILE79 VAL80 GLY81 GLN82 LEU86 TYR89 SER92 SER93 PHE96  
PHE110 VAL114 PHE118 PRO129 TYR137 THR138 PRO139 ALA140 THR141 ILE142  
ARG143 LEU144 LEU145 LEU146 ARG149 GLU150 ILE151 ALA152 VAL153 HSD154  
VAL155 GLY156 ASN157 ASP158 PHE159 LEU160 LEU161 MET162 ALA164 ALA165  
LEU168 LEU172 ASP173 LEU174 SER175 ASP176 GLN177 LEU178 SER179 TYR180  
PHE181 ILE182 PRO183 LEU184 THR185 VAL186 GLY191 GLU192 LEU193 VAL194  
VAL195 TYR196 SER197 LEU198 GLU199 TRP200 ASN201 PRO202 ALA205 MET211  
TYR214 MET215 VAL218 GLU219 ILE222 SER229 VAL230 ALA231 TYR232 ALA233  
PRO234 ASP238 MET239 LEU240 LEU241 PHE242 ASN243 GLY244 GLY245 ARG246  
TYR247 TYR248 HSD249 ARG250 VAL251 SER252 GLU253 VAL254 ARG260 ARG261  
THR262 ILE263 GLY264 GLY265 PHE266 LEU267 ALA268 PHE269 ILE276 TYR277  
TYR278 TRP279 SER280 FOC281 AKG282 6CU283 SOLV6 SOLV11 SOLV13 SOLV16  
SOLV28 SOLV29 SOLV40 SOLV48 SOLV56 SOLV57 SOLV266 SOLV379 SOLV525  
SOLV694 SOLV884 SOLV973 SOLV995 SOLV1724 SOLV1756 SOLV1913 SOLV1985  
SOLV2063 SOLV2432 SOLV2598 SOLV2621 SOLV2651 SOLV2665 SOLV2681  
SOLV2860 SOLV2884 SOLV2949 SOLV2999 SOLV3223 SOLV3277 SOLV3498  
SOLV3831 SOLV3967 SOLV4082 SOLV4295 SOLV4488 SOLV4514 SOLV4526  
SOLV4703 SOLV4707 SOLV4724 SOLV4920 SOLV5327 SOLV5557 SOLV5570  
SOLV5596 SOLV5744 SOLV5754 SOLV5812 SOLV6189 SOLV6421 SOLV6499  
SOLV6510 SOLV6755 SOLV6861 SOLV7251 SOLV7279 SOLV7427 SOLV7465  
SOLV7582 SOLV7601 SOLV7665 SOLV7767 SOLV7865 SOLV74 SOLV245 SOLV258  
SOLV459 SOLV479 SOLV484 SOLV589 SOLV616 SOLV1176 SOLV1240 SOLV1348  
SOLV1379 SOLV1444 SOLV1488 SOLV1565 SOLV1815 SOLV2256 SOLV2531  
SOLV2784 SOLV2893 SOLV3433 SOLV3499 SOLV3573

## Section 2: Yamaguchi's method to estimate the effect of spin contamination on the energies

During the calculation it was found that many species exhibited significant spin contamination, as judged by their  $\langle S^2 \rangle$  values. Large spin contaminations signify the inadequacy of the single-determinant Kohn-Sham framework, and may reduce the reliability of the results. To examine

whether spin contamination had an appreciable effect on the computed energetics, we performed spin projections using Yamaguchi's method on every species whose  $\langle S^2 \rangle$  was at least 0.1 larger than the theoretical value.<sup>1</sup> Specifically, we computed the single point energy,  $E_{LS}$ , of the desired spin state  $S$ , as well as the single point energy  $E_{HS}$  of the spin state  $S + 1$ . The  $\langle S^2 \rangle$  values of both spin states were also obtained from the calculations. Then, the spin-projected energy of the spin state  $S$  was calculated by

$$E_{LS,proj} = \frac{(\langle S^2 \rangle_{HS} - \langle S^2 \rangle_{LS,theor})E_{LS} - (\langle S^2 \rangle_{LS} - \langle S^2 \rangle_{LS,theor})E_{HS}}{\langle S^2 \rangle_{HS} - \langle S^2 \rangle_{LS}}$$

where  $\langle S^2 \rangle_{LS,theor}$  is the theoretical  $\langle S^2 \rangle$  value of spin state  $S$ , namely  $\langle S^2 \rangle_{LS,theor} = S(S + 1)$ . In all cases, the correction introduced by the spin projection were less than 3 kcal/mol. Moreover, the conclusions in the article were not affected by the spin projection. Thus, it was deemed that spin contamination did not play a decisive role in the relative energetics of the species studied in this article.

**Table S1.**  $\langle S^2 \rangle$  for all structures in QM/MM calculations.

|                       |                         |                                   |                         |                                    |                                    |                                   |                                   |
|-----------------------|-------------------------|-----------------------------------|-------------------------|------------------------------------|------------------------------------|-----------------------------------|-----------------------------------|
|                       | <b><sup>3</sup>RC1</b>  | <b><sup>3</sup>TS1</b>            | <b><sup>3</sup>Int1</b> | <b><sup>3</sup>TS2</b>             | <b><sup>3</sup>Int2</b>            | <b><sup>3</sup>TS3</b>            | <b><sup>3</sup>Int3</b>           |
| $\langle S^2 \rangle$ | 2.01                    | 2.04                              | 2.03                    | 2.02                               | 2.14                               | 2.13                              | 2.76                              |
|                       | <b><sup>3</sup>Int4</b> | <b><sup>3</sup>TS<sub>H</sub></b> | <b><sup>3</sup>Int5</b> | <b><sup>3</sup>TS<sub>OH</sub></b> | <b><sup>3</sup>TS<sub>Cl</sub></b> | <b><sup>3</sup>P<sub>OH</sub></b> | <b><sup>3</sup>P<sub>Cl</sub></b> |
| $\langle S^2 \rangle$ | 2.04                    | 3.02                              | 3.06                    | 2.87                               | 2.8                                | 2.21                              | 2.02                              |
|                       | <b><sup>5</sup>RC1</b>  | /                                 | /                       | <b><sup>5</sup>TS2</b>             | <b><sup>5</sup>Int2</b>            | <b><sup>5</sup>TS3</b>            | <b><sup>5</sup>Int3</b>           |
| $\langle S^2 \rangle$ | 6.9                     | /                                 | /                       | 6.06                               | 6.01                               | 6.63                              | 6.05                              |
|                       | <b><sup>5</sup>Int4</b> | <b><sup>5</sup>TS<sub>H</sub></b> | <b><sup>5</sup>Int5</b> | <b><sup>5</sup>TS<sub>OH</sub></b> | <b><sup>5</sup>TS<sub>Cl</sub></b> | <b><sup>5</sup>P<sub>OH</sub></b> | <b><sup>5</sup>P<sub>Cl</sub></b> |
| $\langle S^2 \rangle$ | 6.05                    | 6.94                              | 6.08                    | 6.98                               | 6.98                               | 6.01                              | 6.01                              |

### Section 3: QM/MM results with the ChemShell program.

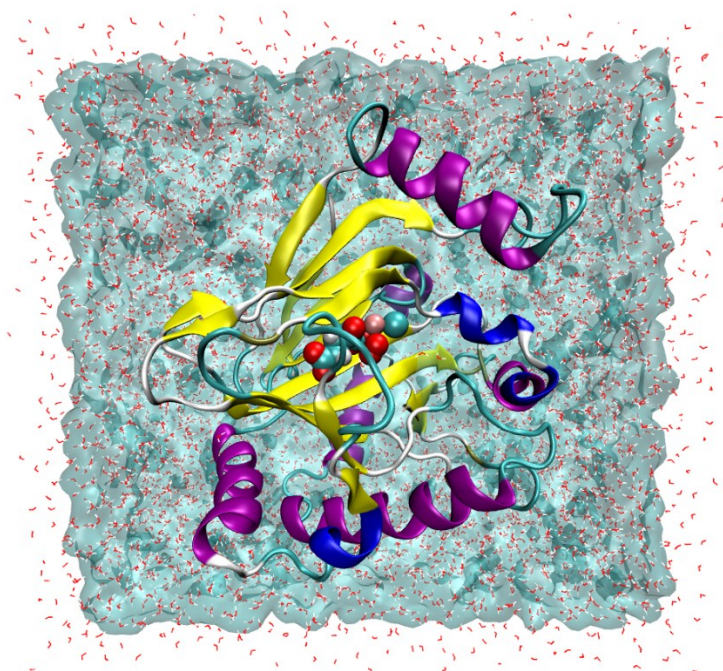

**Figure S1.** Wild-type WelO5 with a water layer of 12 Å thickness from solvation setup. Atoms of QM region are shown in the VMD model. Water molecules are shown in lines. Others are shown in the “New Cartoon” model.

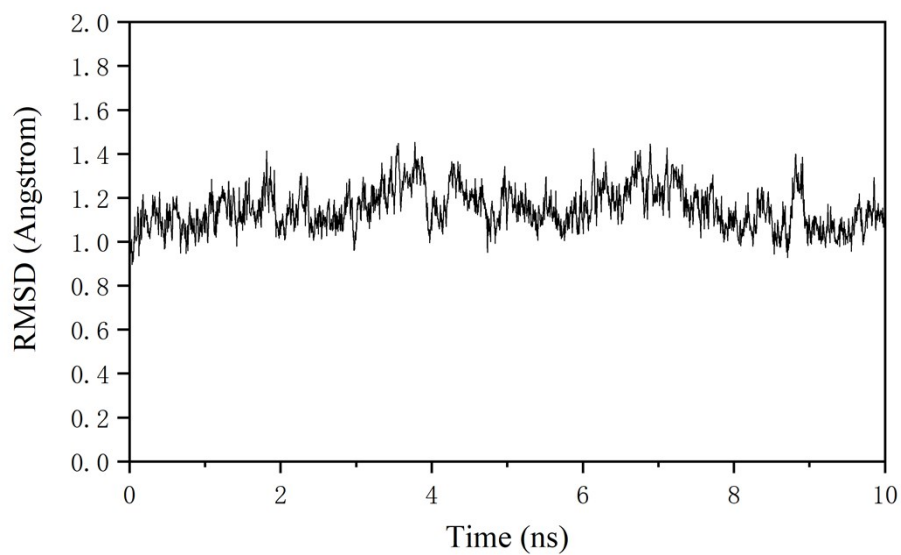

**Figure S2.** RMSD in the MD simulation for 10 ns. (Benchmark is protein backbone.)

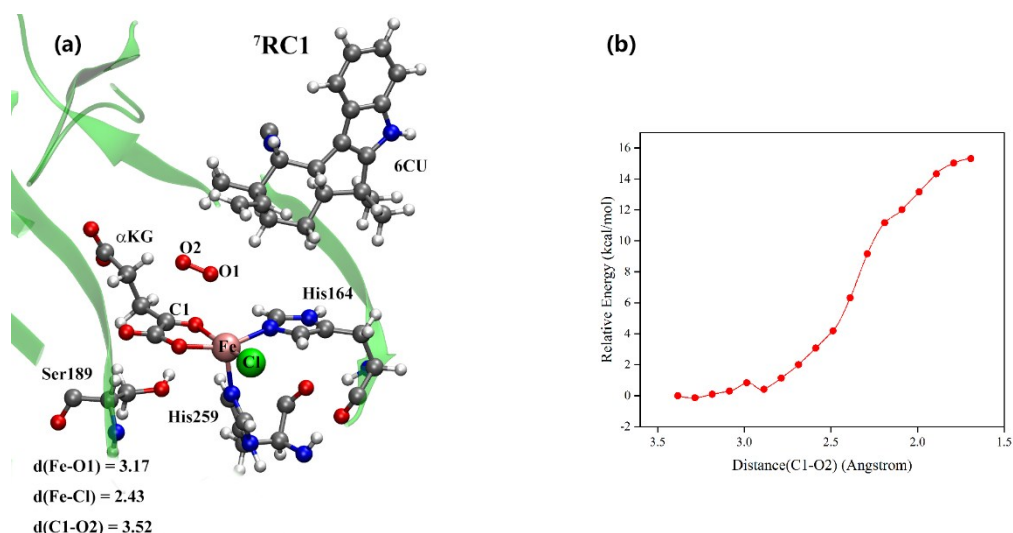

**Figure S3.**  $\text{O}_2$  activation on the septet surface. (a) The QM/MM-optimized geometry (in Å) of  ${}^7\text{RC1}$ , along with the key structural parameters at UB3LYP/B1. (b) UB3LYP/B2 relative QM/MM energies (kcal/mol) for  $\text{O}_2$  binding to Fe(II) species on the septet pathway. As we can see from (b), the approach of  $\text{O}_2$  to C1 is accompanied by an almost monotonic increase in energy. Therefore, no stable adduct of the enzyme with  $\text{O}_2$  is present on the septet PES.

**Table S2.** The Mulliken spin populations of key atoms of the enlarged QM region (total 277 atoms) versus those of the chosen QM region (total 89 atoms). Geometry is from  ${}^5\text{RC1}$ .

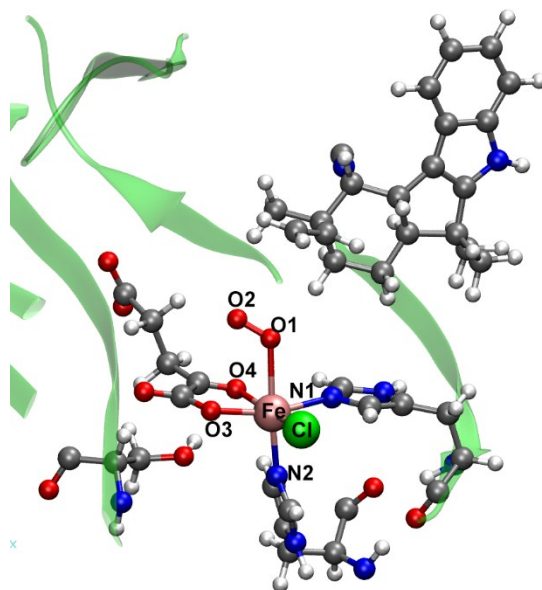

| Spin populations | Fe      | Cl      | O1      | O2       | O3      | O4      | N1      | N2      |
|------------------|---------|---------|---------|----------|---------|---------|---------|---------|
| Large QM region  | 3.77919 | 0.05640 | 0.02245 | -0.01298 | 0.03601 | 0.02304 | 0.02149 | 0.01276 |
| Chosen QM region | 3.77672 | 0.06226 | 0.02728 | -0.01157 | 0.03837 | 0.02227 | 0.02174 | 0.01201 |

The large QM region contains ARG143, ILE151, HSD154, VAL155, GLY156, GLN177, SER179, LEU193, PHE 242, GLY244, HSD249, PHE266, FOC281, AKG282, 6CU283 and five water molecules. As seen from the table, the large QM region shares similar spin populations with the

chosen QM region for the first coordination shell of Fe.

**Table S3.** Spin populations for species in the S=1 and S=2 pathways.

|               | <sup>3</sup> RC1 | <sup>3</sup> TS1 | <sup>3</sup> Int1 | <sup>3</sup> TS2 |                       | <sup>3</sup> Int2 | <sup>3</sup> TS3 | <sup>3</sup> Int3 |
|---------------|------------------|------------------|-------------------|------------------|-----------------------|-------------------|------------------|-------------------|
| <b>Fe</b>     | 3.77133          | 1.07617          | 1.10570           | 0.98423          | <b>Fe</b>             | 1.97854           | 2.14566          | 2.77313           |
| <b>Cl</b>     | 0.06007          | 0.00237          | 0.00874           | -0.02381         | <b>Cl</b>             | -0.00600          | -0.01960         | -0.04474          |
| <b>O1</b>     | -0.97198         | 0.52362          | 0.53116           | 0.10923          | <b>O1</b>             | 0.01940           | -0.01153         | -0.51671          |
| <b>O2</b>     | -0.99512         | 0.46884          | 0.37651           | 0.06367          | <b>CO<sub>2</sub></b> | 0.00117           | 0.00186          | 0.00463           |
| <b>α-KG</b>   | 0.06361          | -0.02339         | 0.02626           | 0.86775          | <b>SUC</b>            | -0.02126          | -0.15627         | -0.26996          |
| <b>His164</b> | 0.03014          | -0.02170         | -0.02271          | -0.01316         | <b>His164</b>         | 0.04050           | 0.04831          | 0.06084           |
| <b>His259</b> | 0.04262          | -0.02692         | -0.02748          | -0.00852         | <b>His259</b>         | -0.01269          | -0.00914         | -0.00927          |
| <b>6CU</b>    | -0.00169         | -0.00102         | -0.00069          | 0.00122          | <b>6CU</b>            | 0.00018           | 0.00027          | 0.00145           |
| <b>Ser189</b> | 0.00102          | 0.00204          | 0.00252           | 0.01935          | <b>Ser189</b>         | 0.00016           | 0.00042          | 0.00062           |

  

|               | <sup>5</sup> RC1 | / | / | <sup>5</sup> TS2 |                       | <sup>5</sup> Int2 | <sup>5</sup> TS3 | <sup>5</sup> Int3 |
|---------------|------------------|---|---|------------------|-----------------------|-------------------|------------------|-------------------|
| <b>Fe</b>     | 3.77672          |   |   | 4.21949          | <b>Fe</b>             | 3.75382           | 3.09597          | 3.08648           |
| <b>Cl</b>     | 0.06226          |   |   | 0.15244          | <b>Cl</b>             | 0.05570           | 0.00375          | 0.10137           |
| <b>O1</b>     | 0.02728          |   |   | -0.39838         | <b>O1</b>             | 0.07602           | 0.52324          | 0.66056           |
| <b>O2</b>     | -0.01157         |   |   | -0.32834         | <b>CO<sub>2</sub></b> | 0.00000           | 0.00000          | 0.00022           |
| <b>α-KG</b>   | 0.06984          |   |   | 0.18426          | <b>SUC</b>            | 0.03904           | 0.30031          | 0.10229           |
| <b>His164</b> | 0.03444          |   |   | 0.07799          | <b>His164</b>         | 0.03115           | -0.00384         | -0.02629          |
| <b>His259</b> | 0.04146          |   |   | 0.09189          | <b>His259</b>         | 0.04297           | 0.07211          | 0.07424           |
| <b>6CU</b>    | -0.00139         |   |   | 0.00115          | <b>6CU</b>            | 0.00027           | 0.00000          | 0.00000           |
| <b>Ser189</b> | 0.00100          |   |   | -0.00053         | <b>Ser189</b>         | 0.00104           | 0.00843          | 0.00118           |

  

|               | <sup>5</sup> Int4 | <sup>5</sup> TS <sub>H</sub> | <sup>5</sup> Int5 | <sup>5</sup> TS <sub>Cl</sub> | <sup>5</sup> P <sub>Cl</sub> | <sup>5</sup> TS <sub>OH</sub> | <sup>5</sup> P <sub>OH</sub> |
|---------------|-------------------|------------------------------|-------------------|-------------------------------|------------------------------|-------------------------------|------------------------------|
| <b>Fe</b>     | 3.05635           | 4.16192                      | 4.19003           | 4.17004                       | 3.7578                       | 4.18492                       | 3.77875                      |
| <b>Cl</b>     | 0.07890           | 0.15389                      | 0.17051           | 0.18010                       | 0.01932                      | 0.14507                       | 0.05975                      |
| <b>O1</b>     | 0.69052           | 0.11493                      | 0.27875           | 0.26923                       | 0.09438                      | 0.27927                       | 0.01045                      |
| <b>SUC</b>    | 0.09596           | 0.16017                      | 0.18381           | 0.18371                       | 0.07265                      | 0.19049                       | 0.07924                      |
| <b>His164</b> | -0.02181          | 0.06027                      | 0.04906           | 0.04911                       | 0.01731                      | 0.05810                       | 0.03569                      |
| <b>His259</b> | 0.09440           | 0.09115                      | 0.10366           | 0.09425                       | 0.03070                      | 0.09288                       | 0.03129                      |
| <b>Ser189</b> | -0.00130          | 0.00193                      | 0.00458           | 0.00478                       | 0.00516                      | 0.00411                       | 0.00052                      |
| <b>6CU</b>    | 0.00702           | -0.74432                     | -0.98026          | -0.95101                      | 0.00286                      | -0.95503                      | 0.00415                      |

|               | <sup>3</sup> Int4 | <sup>3</sup> TS <sub>H</sub> | <sup>3</sup> Int5 | <sup>3</sup> TS <sub>Cl</sub> | <sup>3</sup> P <sub>Cl</sub> | <sup>3</sup> TS <sub>OH</sub> | <sup>3</sup> P <sub>OH</sub> |
|---------------|-------------------|------------------------------|-------------------|-------------------------------|------------------------------|-------------------------------|------------------------------|
| <b>Fe</b>     | 3.05635           | 4.16192                      | 4.19003           | 4.17004                       | 3.7578                       | 4.18492                       | 3.77875                      |
| <b>Cl</b>     | 0.07890           | 0.15389                      | 0.17051           | 0.18010                       | 0.01932                      | 0.14507                       | 0.05975                      |
| <b>O1</b>     | 0.69052           | 0.11493                      | 0.27875           | 0.26923                       | 0.09438                      | 0.27927                       | 0.01045                      |
| <b>SUC</b>    | 0.09596           | 0.16017                      | 0.18381           | 0.18371                       | 0.07265                      | 0.19049                       | 0.07924                      |
| <b>His164</b> | -0.02181          | 0.06027                      | 0.04906           | 0.04911                       | 0.01731                      | 0.05810                       | 0.03569                      |
| <b>His259</b> | 0.09440           | 0.09115                      | 0.10366           | 0.09425                       | 0.03070                      | 0.09288                       | 0.03129                      |
| <b>Ser189</b> | -0.00130          | 0.00193                      | 0.00458           | 0.00478                       | 0.00516                      | 0.00411                       | 0.00052                      |
| <b>6CU</b>    | 0.00702           | -0.74432                     | -0.98026          | -0.95101                      | 0.00286                      | -0.95503                      | 0.00415                      |

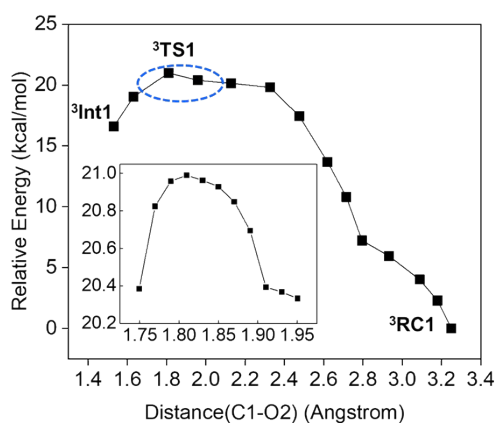

**Figure S4.** Energy scans for C1-O2 bonding process from <sup>3</sup>RC1 to <sup>3</sup>Int1.

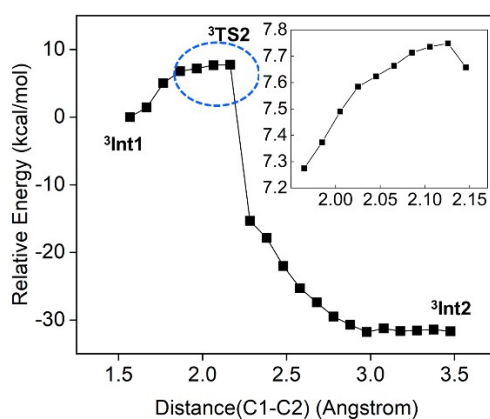

**Figure S5.** Energy scans for decarboxylation process from <sup>3</sup>Int1 to <sup>3</sup>Int2.

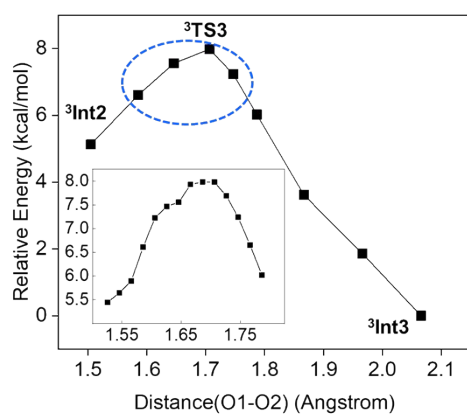

Figure S6. Energy scans for O1-O2 cleavage process from  $^3\text{Int2}$  to  $^3\text{Int3}$ .

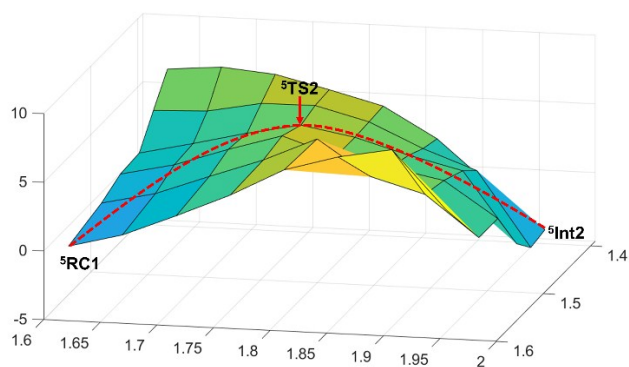

Figure S7. 2D energy scan for decarboxylation process from  $^5\text{RC1}$  to  $^5\text{Int2}$ .

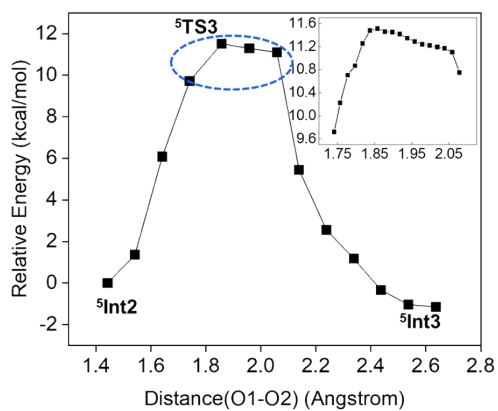

Figure S8. Energy scans for O1-O2 cleavage process from  $^5\text{Int2}$  to  $^5\text{Int3}$ .

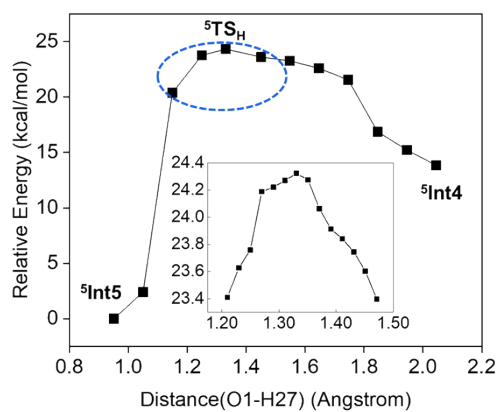

Figure S9. Energy scans for H-abstraction process from  $^5\text{Int4}$  to  $^5\text{Int5}$ .

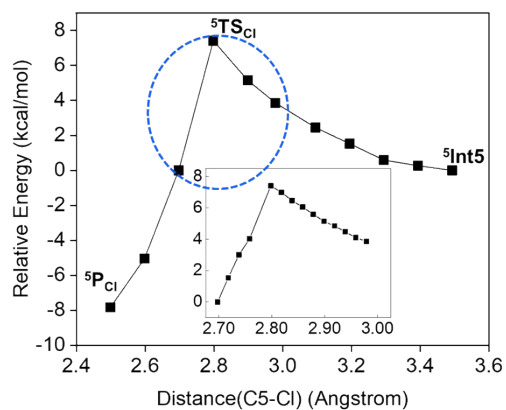

Figure S10. Energy scans for chlorination process from  $^5\text{Int5}$  to  $^5\text{P}_{\text{Cl}}$ .

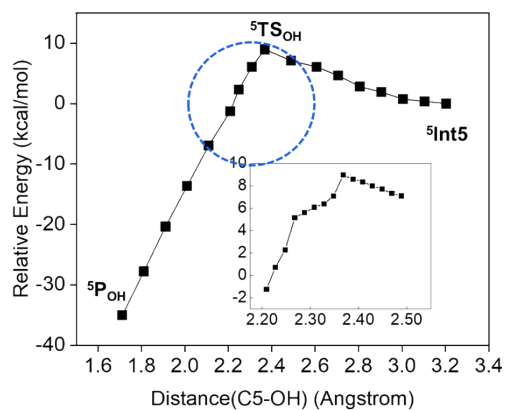

Figure S11. Energy scans for hydroxylation process from  $^5\text{Int5}$  to  $^5\text{P}_{\text{OH}}$ .



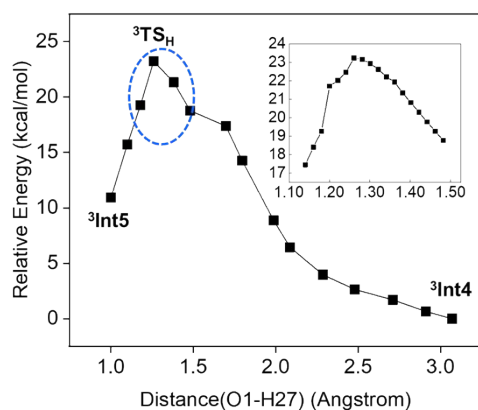

Figure S12. Energy scans for H-abstraction process from  $^3\text{Int4}$  to  $^3\text{Int5}$ .

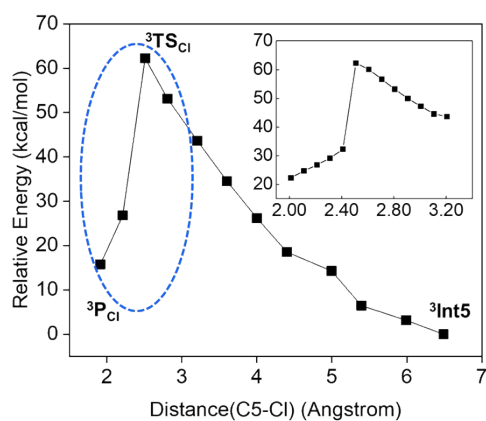

Figure S13. Energy scans for chlorination process from  $^3\text{Int5}$  to  $^3\text{P}_{\text{Cl}}$ .

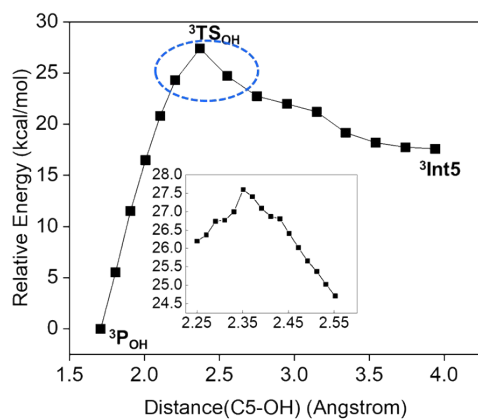

Figure S14. Energy scans for hydroxylation process from  $^3\text{Int5}$  to  $^3\text{P}_{\text{OH}}$ .

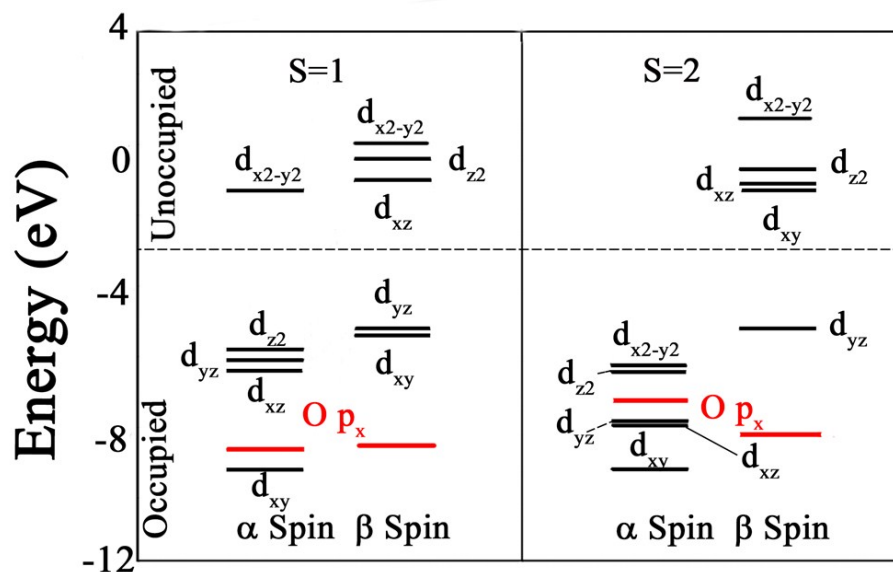

Figure S15. Molecular orbital diagrams of  $^3\text{Int2}$  and  $^5\text{on}^3\text{Int2}$ .

#### Section 4: Cartesian coordinates

The Cartesian coordinates of the QM regions in QM/MM calculations

|                                   |           |           |           |           |           |           |           |
|-----------------------------------|-----------|-----------|-----------|-----------|-----------|-----------|-----------|
| <b><math>^3\text{RC1}</math>:</b> | C         | 41.041318 | 30.876903 | 43.196567 |           |           |           |
| C                                 | 43.196973 | 25.308853 | 42.803678 | H         | 41.995478 | 31.318347 | 42.944431 |
| H                                 | 44.156732 | 25.582019 | 42.356048 | N         | 40.215200 | 30.282124 | 42.345575 |
| H                                 | 43.091843 | 24.224818 | 42.690709 | C         | 39.139697 | 29.841365 | 43.084827 |
| N                                 | 40.773210 | 25.672191 | 42.010170 | H         | 38.318271 | 29.310748 | 42.626268 |
| H                                 | 40.358540 | 24.828093 | 42.409644 | Fe        | 40.543088 | 29.652446 | 40.358849 |
| C                                 | 42.106288 | 26.056445 | 42.096258 | Cl        | 42.874198 | 30.341679 | 40.258163 |
| C                                 | 40.101653 | 26.633551 | 41.332425 | O         | 39.945669 | 28.920339 | 36.953440 |
| H                                 | 39.043217 | 26.597596 | 41.124478 | O         | 40.765721 | 28.601668 | 37.792200 |
| N                                 | 40.923689 | 27.612553 | 40.968308 | C         | 36.363667 | 29.781880 | 38.715217 |
| C                                 | 42.174439 | 27.254015 | 41.436255 | C         | 37.765911 | 29.938011 | 39.219752 |
| H                                 | 43.028554 | 27.893043 | 41.277014 | H         | 35.792982 | 30.678759 | 38.986596 |
| C                                 | 40.071280 | 34.617223 | 39.021856 | H         | 35.896301 | 28.911551 | 39.178570 |
| H                                 | 39.577445 | 35.070319 | 39.896200 | O         | 38.331229 | 29.118237 | 39.950519 |
| H                                 | 39.305740 | 34.096576 | 38.431956 | C         | 38.604384 | 31.176713 | 38.781515 |
| O                                 | 41.084774 | 33.716166 | 39.417641 | O         | 39.819842 | 31.152097 | 39.210185 |
| H                                 | 40.748138 | 32.810994 | 39.286975 | O         | 38.083249 | 32.056526 | 38.093138 |
| C                                 | 38.438701 | 29.851748 | 45.563675 | C         | 36.359100 | 29.651514 | 37.176421 |
| H                                 | 37.401110 | 29.742870 | 45.238883 | C         | 35.002674 | 29.256892 | 36.533075 |
| H                                 | 38.462496 | 30.664940 | 46.293795 | H         | 37.092018 | 28.899024 | 36.856239 |
| N                                 | 40.529477 | 30.841523 | 44.448650 | H         | 36.673170 | 30.605923 | 36.751169 |
| H                                 | 41.001825 | 31.226265 | 45.271890 | O         | 34.076004 | 28.887928 | 37.295092 |
| C                                 | 39.314489 | 30.164300 | 44.400683 | O         | 34.994205 | 29.328337 | 35.270705 |

C 42.040982 26.808131 35.044581  
C 41.889767 25.768981 35.867884  
H 42.988425 27.338140 34.993123  
H 41.251486 27.176387 34.396944  
H 42.743802 25.491296 36.482306  
C 39.429917 25.553957 35.331928  
H 39.601595 25.579856 34.250305  
H 38.524201 24.969471 35.510438  
H 39.246050 26.579110 35.667489  
C 41.319648 20.812453 39.667244  
H 40.397350 20.401023 39.243205  
H 41.864196 19.989601 40.143946  
H 41.050040 21.526023 40.455832  
C 42.181052 21.499419 38.592974  
C 43.525305 21.954463 39.204927  
H 44.148854 22.475057 38.471270  
H 44.095259 21.093316 39.568884  
H 43.360339 22.628613 40.053457  
C 38.746952 22.012738 35.599849  
N 39.683695 22.715141 35.497738  
C 40.897371 23.481440 35.539667  
H 41.263114 23.562026 34.509626  
C 40.628225 24.943957 36.080881  
C 40.305420 24.889877 37.608834  
H 39.306060 24.448550 37.703750  
H 40.233250 25.917475 37.981805  
C 41.279743 24.067635 38.488878  
H 40.880056 24.033757 39.510196  
H 42.260136 24.555319 38.556690  
C 41.395479 22.667664 37.888837  
C 41.928654 22.751227 36.430978  
H 40.373384 22.277419 37.799634  
H 42.834400 23.372741 36.394985  
C 42.407882 20.647352 37.359599  
N 42.804407 19.346926 37.139552  
C 42.895786 19.166636 35.761030  
C 43.195786 18.012696 35.030248  
C 43.219039 18.104050 33.641397  
C 42.952437 19.324630 32.987583  
C 42.644723 20.471431 33.708824  
C 42.598496 20.408345 35.113770  
C 42.277681 21.318246 36.171221  
H 42.783315 18.582179 37.818271  
H 43.387348 17.076049 35.538408

H 43.448039 17.220648 33.053960  
H 42.990978 19.372714 31.903247  
H 42.440284 21.405109 33.190970  
H 43.218747 25.474460 43.880788  
H 38.747629 28.966424 46.119401  
H 40.496667 35.447039 38.457482

**<sup>3</sup>TS1:**

C 43.188283 25.327888 42.818010  
H 44.150743 25.583651 42.366046  
H 43.053298 24.250256 42.683936  
N 40.771294 25.750386 42.036305  
H 40.350149 24.889350 42.389474  
C 42.105372 26.118257 42.146683  
C 40.104113 26.756710 41.423698  
H 39.048542 26.748687 41.203896  
N 40.936976 27.750275 41.132111  
C 42.183861 27.358917 41.572828  
H 43.044480 27.994606 41.448886  
C 40.032852 34.661093 39.075505  
H 39.504329 35.144708 39.909353  
H 39.291020 34.111465 38.483976  
O 41.040107 33.785669 39.548974  
H 40.676003 32.880515 39.533237  
C 38.452419 29.862414 45.471769  
H 37.410279 29.758196 45.159344  
H 38.494098 30.696564 46.177688  
N 40.537532 30.807144 44.306898  
H 41.008424 31.218605 45.115351  
C 39.325224 30.126278 44.290993  
C 41.050102 30.796250 43.054149  
H 41.997167 31.239474 42.785458  
N 40.222891 30.156643 42.235203  
C 39.144583 29.747023 42.990165  
H 38.323270 29.207289 42.548420  
FE 40.447864 29.558059 40.361697  
CL 42.653724 30.277516 40.319269  
O 39.383109 28.932346 37.870915  
O 40.521949 28.864142 38.500083  
C 36.827250 29.210226 38.585679  
C 38.197242 29.610193 39.088157  
H 36.094490 29.757329 39.193873  
H 36.686383 28.149709 38.814736  
O 38.642964 29.050694 40.185657

C 38.745254 31.050534 38.904960  
O 39.841320 31.211254 39.591503  
O 38.215064 31.901455 38.198795  
C 36.567807 29.490755 37.101025  
C 35.161514 29.118244 36.559827  
H 37.299466 28.945091 36.495467  
H 36.723588 30.555276 36.904650  
O 34.302163 28.699070 37.377975  
O 35.026691 29.279682 35.311362  
C 42.056417 26.876736 35.098525  
C 41.917849 25.805752 35.882200  
H 43.005777 27.403154 35.046509  
H 41.252797 27.277332 34.488913  
H 42.785099 25.497504 36.462821  
C 39.452066 25.616633 35.374079  
H 39.613692 25.659179 34.291303  
H 38.544275 25.034529 35.551141  
H 39.280190 26.636130 35.733738  
C 41.319587 20.838586 39.674071  
H 40.394997 20.433265 39.248992  
H 41.860277 20.010316 40.145925  
H 41.054364 21.550296 40.465896  
C 42.183240 21.523973 38.600607  
C 43.533354 21.966412 39.209587  
H 44.158085 22.484097 38.474796  
H 44.097691 21.099617 39.568848  
H 43.376929 22.639903 40.060450  
C 38.749565 22.061935 35.614563  
N 39.687257 22.763817 35.514560  
C 40.905170 23.524315 35.556438  
H 41.267742 23.605215 34.525191  
C 40.652611 24.988275 36.103299  
C 40.344444 24.940423 37.634461  
H 39.337773 24.518597 37.740633  
H 40.298182 25.971315 38.001746  
C 41.310704 24.099737 38.505713  
H 40.911589 24.065028 39.527681  
H 42.297702 24.574379 38.573683  
C 41.406555 22.700264 37.900994  
C 41.934423 22.780398 36.440528  
H 40.379351 22.322802 37.815311  
H 42.845669 23.393570 36.402793  
C 42.401846 20.671995 37.366537  
N 42.796358 19.370840 37.147963

C 42.888007 19.189121 35.769919  
C 43.190472 18.034377 35.040890  
C 43.215732 18.124796 33.651965  
C 42.948200 19.344479 32.996814  
C 42.639127 20.491988 33.716584  
C 42.591558 20.431026 35.121632  
C 42.271823 21.343304 36.178419  
H 42.772812 18.606328 37.826845  
H 43.383687 17.097552 35.549315  
H 43.446729 17.240993 33.065675  
H 42.987790 19.391325 31.912312  
H 42.433757 21.425233 33.198108  
H 43.220453 25.476453 43.897343  
H 38.751637 28.988153 46.049872  
H 40.475253 35.467037 38.490012

### <sup>3</sup>Int1

C 43.200673 25.329958 42.831239  
H 44.160046 25.589982 42.382182  
H 43.068872 24.254715 42.698981  
N 40.793566 25.733686 42.044105  
H 40.381070 24.873166 42.399876  
C 42.120280 26.111599 42.159672  
C 40.120854 26.725440 41.423485  
H 39.068947 26.712713 41.200211  
N 40.949208 27.714744 41.132005  
C 42.195600 27.343075 41.580830  
H 43.049111 27.982472 41.457509  
C 40.054865 34.569234 38.988999  
H 39.470887 34.970481 39.824283  
H 39.382247 34.004363 38.337701  
O 41.091377 33.726381 39.456523  
H 40.706826 32.840121 39.589410  
C 38.465596 29.859612 45.452561  
H 37.430874 29.751279 45.127822  
H 38.499790 30.696578 46.151240  
N 40.562861 30.774690 44.300000  
H 41.025253 31.193554 45.105365  
C 39.347234 30.106724 44.281279  
C 41.084550 30.746840 43.055368  
H 42.032827 31.181446 42.788524  
N 40.258868 30.107349 42.244616  
C 39.171880 29.714336 42.989988  
H 38.350470 29.181598 42.547386

FE 40.463338 29.507946 40.377271  
CL 42.624805 30.222324 40.307566  
O 39.302583 28.885389 37.993681  
O 40.494237 28.845455 38.550606  
C 36.882345 29.199169 38.603403  
C 38.287588 29.534574 39.057466  
H 36.211826 29.815111 39.208109  
H 36.680573 28.160911 38.870040  
O 38.665444 29.018496 40.230371  
C 38.766837 31.015973 38.947626  
O 39.834746 31.193760 39.656191  
O 38.210648 31.863296 38.271371  
C 36.609239 29.447824 37.122003  
C 35.200361 29.086440 36.607451  
H 37.318549 28.883237 36.512762  
H 36.766711 30.503372 36.898532  
O 34.358763 28.652267 37.426084  
O 35.026717 29.261828 35.370598  
C 42.046662 26.830475 35.138714  
C 41.919953 25.785559 35.944674  
H 42.986431 27.364874 35.070961  
H 41.236180 27.199626 34.523849  
H 42.782679 25.494801 36.535079  
C 39.461954 25.591341 35.455874  
H 39.612719 25.625562 34.374992  
H 38.559748 25.013087 35.649845  
H 39.297004 26.610418 35.809402  
C 41.366709 20.853291 39.701413  
H 40.440297 20.451057 39.285996  
H 41.915275 20.029991 40.165072  
H 41.115302 21.568137 40.490548  
C 42.213271 21.531469 38.623647  
C 43.565928 21.968932 39.208052  
H 44.176265 22.485822 38.465447  
H 44.129281 21.100566 39.554142  
H 43.418028 22.636944 40.060314  
C 38.774176 22.065337 35.691200  
N 39.700062 22.761631 35.590164  
C 40.914690 23.520873 35.616603  
H 41.262784 23.600940 34.583902  
C 40.664081 24.971262 36.170747  
C 40.368856 24.919264 37.696371  
H 39.371599 24.486181 37.807870  
H 40.310051 25.946745 38.062760

C 41.347845 24.091913 38.549339  
H 40.970673 24.056782 39.575495  
H 42.332559 24.565570 38.597305  
C 41.433954 22.703513 37.941671  
C 41.943336 22.782650 36.484195  
H 40.409810 22.325010 37.868621  
H 42.854678 23.389944 36.438867  
C 42.413457 20.680547 37.395536  
N 42.809699 19.385139 37.171328  
C 42.895794 19.206868 35.794133  
C 43.196382 18.062470 35.061127  
C 43.210513 18.160915 33.677722  
C 42.934501 19.377015 33.032104  
C 42.624500 20.515644 33.755910  
C 42.589188 20.448588 35.154864  
C 42.273765 21.352329 36.215188  
H 42.784079 18.619157 37.844834  
H 43.395840 17.124165 35.559213  
H 43.441256 17.283586 33.088037  
H 42.970619 19.427609 31.950525  
H 42.411180 21.447338 33.243428  
H 43.229070 25.477394 43.910832  
H 38.760259 28.989921 46.039825  
H 40.483162 35.417197 38.454597

**<sup>3</sup>TS2:**

C 43.229010 25.331482 42.817946  
H 44.196982 25.586987 42.378152  
H 43.095257 24.253858 42.682179  
N 40.818910 25.738130 42.034920  
H 40.404079 24.877242 42.395619  
C 42.151172 26.116942 42.134811  
C 40.141617 26.733113 41.419956  
H 39.085013 26.711638 41.208774  
N 40.967208 27.728978 41.113932  
C 42.220269 27.352132 41.546601  
H 43.072501 27.996633 41.409183  
C 40.091783 34.635885 38.998593  
H 39.497213 35.052368 39.822780  
H 39.422836 34.069791 38.342660  
O 41.143405 33.813915 39.463130  
H 40.765813 32.936382 39.643705  
C 38.450523 29.875181 45.470332  
H 37.409094 29.770505 45.155393

H 38.490292 30.706252 46.180059  
N 40.552618 30.786336 44.301967  
H 41.028998 31.199674 45.106097  
C 39.321902 30.137690 44.288891  
C 41.064684 30.750698 43.049520  
H 42.020778 31.171585 42.774902  
N 40.220359 30.132256 42.231522  
C 39.131383 29.759941 42.989705  
H 38.295579 29.236448 42.554447  
FE 40.409430 29.480990 40.331686  
CL 42.615050 30.269399 40.281225  
O 39.184541 28.780269 38.048270  
O 40.506685 28.822456 38.654646  
C 36.794293 28.827521 38.496581  
C 38.204854 28.982612 38.999958  
H 36.134408 29.374334 39.174582  
H 36.537102 27.765099 38.612372  
O 38.533288 28.928939 40.221381  
C 38.732018 31.282852 38.918048  
O 39.750701 31.253520 39.664751  
O 38.211148 32.110778 38.202470  
C 36.583542 29.265370 37.046177  
C 35.154668 29.044264 36.491949  
H 37.279152 28.728826 36.392940  
H 36.821814 30.331087 36.953907  
O 34.276096 28.646911 37.301083  
O 35.021816 29.286115 35.258390  
C 42.040054 26.879417 35.086715  
C 41.902138 25.805771 35.866641  
H 42.987845 27.408849 35.037862  
H 41.235920 27.280862 34.478302  
H 42.768287 25.497304 36.448752  
C 39.440250 25.609375 35.343372  
H 39.611513 25.654845 34.262129  
H 38.534167 25.021816 35.511273  
H 39.260990 26.627614 35.702930  
C 41.288919 20.836105 39.651077  
H 40.367252 20.430313 39.220140  
H 41.825744 20.009017 40.129268  
H 41.017210 21.549460 40.439330  
C 42.160048 21.521344 38.583480  
C 43.504042 21.966538 39.203087  
H 44.133684 22.485575 38.473503  
H 44.067303 21.101322 39.567967

H 43.338835 22.640093 40.052213  
C 38.741637 22.057671 35.590760  
N 39.678356 22.760168 35.486808  
C 40.895616 23.521919 35.533699  
H 41.262489 23.604134 34.504034  
C 40.637848 24.985342 36.080880  
C 40.320184 24.936759 37.610316  
H 39.313735 24.511848 37.709157  
H 40.272654 25.968120 37.977337  
C 41.284577 24.095933 38.483295  
H 40.888078 24.062224 39.506377  
H 42.271193 24.571320 38.549299  
C 41.384980 22.696300 37.879491  
C 41.920214 22.777090 36.421997  
H 40.359434 22.315535 37.788716  
H 42.831690 23.390240 36.389681  
C 42.388245 20.670331 37.350541  
N 42.789181 19.370438 37.135338  
C 42.886504 19.187298 35.757956  
C 43.195910 18.032309 35.032365  
C 43.225836 18.119846 33.643366  
C 42.956788 19.337514 32.985181  
C 42.641307 20.485560 33.701557  
C 42.588328 20.427836 35.106682  
C 42.261177 21.340229 36.161075  
H 42.762861 18.606466 37.814779  
H 43.390452 17.097375 35.543639  
H 43.462300 17.235688 33.059752  
H 43.000073 19.382499 31.900770  
H 42.435670 21.416474 33.179197  
H 43.245385 25.479517 43.897707  
H 38.750838 28.998798 46.044641  
H 40.510658 35.480410 38.451431

**<sup>3</sup>Int2:**

C 43.280282 25.216595 42.931635  
H 44.238545 25.506711 42.491677  
H 43.206980 24.128922 42.828636  
N 40.851497 25.486217 42.157530  
H 40.464027 24.635576 42.573172  
C 42.170048 25.917727 42.210506  
C 40.138717 26.416927 41.473179  
H 39.076447 26.339590 41.297287  
N 40.914069 27.410169 41.072059

|    |           |           |           |   |           |           |           |
|----|-----------|-----------|-----------|---|-----------|-----------|-----------|
| C  | 42.179821 | 27.105392 | 41.522692 | H | 39.319865 | 26.660718 | 35.906708 |
| H  | 43.011103 | 27.768293 | 41.329847 | C | 41.420751 | 20.823007 | 39.761046 |
| C  | 40.181435 | 34.543519 | 38.907627 | H | 40.482514 | 20.421864 | 39.362576 |
| H  | 39.478684 | 34.869212 | 39.689930 | H | 41.973419 | 19.993413 | 40.216606 |
| H  | 39.630659 | 33.939810 | 38.171840 | H | 41.181609 | 21.533929 | 40.561597 |
| O  | 41.270849 | 33.833244 | 39.446605 | C | 42.254404 | 21.509343 | 38.664782 |
| H  | 41.025792 | 32.904615 | 39.569512 | C | 43.622839 | 21.944331 | 39.237361 |
| C  | 38.438687 | 29.805108 | 45.489082 | H | 44.228222 | 22.464753 | 38.488545 |
| H  | 37.397590 | 29.683499 | 45.179547 | H | 44.194483 | 21.073892 | 39.575599 |
| H  | 38.469128 | 30.649307 | 46.184150 | H | 43.492357 | 22.613260 | 40.095837 |
| N  | 40.514895 | 30.755480 | 44.325909 | C | 38.739506 | 22.083367 | 35.750651 |
| H  | 40.982606 | 31.160996 | 45.136952 | N | 39.679155 | 22.782604 | 35.652011 |
| C  | 39.304942 | 30.067378 | 44.304064 | C | 40.903979 | 23.534741 | 35.670218 |
| C  | 41.027249 | 30.746873 | 43.072697 | H | 41.239397 | 23.621370 | 34.630238 |
| H  | 41.971202 | 31.198042 | 42.802839 | C | 40.679389 | 24.996722 | 36.233355 |
| N  | 40.207529 | 30.110000 | 42.243738 | C | 40.414247 | 24.945331 | 37.772144 |
| C  | 39.132720 | 29.692755 | 43.000523 | H | 39.406462 | 24.532556 | 37.904410 |
| H  | 38.319276 | 29.140288 | 42.555011 | H | 40.391128 | 25.974381 | 38.147167 |
| FE | 40.479527 | 29.483849 | 40.323753 | C | 41.395139 | 24.088891 | 38.610114 |
| CL | 42.591742 | 30.575416 | 40.243056 | H | 41.028983 | 24.053966 | 39.643307 |
| O  | 39.209586 | 28.760621 | 37.976894 | H | 42.387995 | 24.553411 | 38.651028 |
| O  | 40.459661 | 29.374037 | 38.487655 | C | 41.462694 | 22.692616 | 37.994446 |
| C  | 36.934792 | 28.206071 | 38.371694 | C | 41.951310 | 22.779012 | 36.520884 |
| C  | 38.286600 | 28.637880 | 38.899274 | H | 40.431683 | 22.319928 | 37.935405 |
| H  | 36.181500 | 28.530716 | 39.092687 | H | 42.863360 | 23.389420 | 36.463755 |
| H  | 36.901711 | 27.108574 | 38.360502 | C | 42.436662 | 20.664117 | 37.419907 |
| O  | 38.512352 | 28.902394 | 40.098051 | N | 42.835508 | 19.366948 | 37.183851 |
| C  | 37.905508 | 32.088976 | 38.737326 | C | 42.904292 | 19.196487 | 35.803278 |
| O  | 38.637535 | 31.944056 | 39.639083 | C | 43.207621 | 18.050979 | 35.060629 |
| O  | 37.170830 | 32.256331 | 37.844766 | C | 43.215806 | 18.153229 | 33.672233 |
| C  | 36.629534 | 28.771343 | 36.980201 | C | 42.930572 | 19.376187 | 33.031229 |
| C  | 35.159326 | 28.697353 | 36.507367 | C | 42.618798 | 20.514490 | 33.764791 |
| H  | 37.259158 | 28.287417 | 36.226064 | C | 42.588621 | 20.441973 | 35.169897 |
| H  | 36.902135 | 29.833375 | 36.959159 | C | 42.279952 | 21.343453 | 36.239570 |
| O  | 34.297888 | 28.301738 | 37.333838 | H | 42.817891 | 18.596073 | 37.855036 |
| O  | 34.975515 | 29.075402 | 35.314402 | H | 43.417060 | 17.111864 | 35.558397 |
| C  | 42.084705 | 26.842455 | 35.154176 | H | 43.448897 | 17.276727 | 33.075813 |
| C  | 41.945936 | 25.802350 | 35.978022 | H | 42.960590 | 19.431998 | 31.946568 |
| H  | 43.035336 | 27.363183 | 35.077153 | H | 42.399943 | 21.450106 | 33.256205 |
| H  | 41.277199 | 27.226815 | 34.539120 | H | 43.279935 | 25.392601 | 44.007315 |
| H  | 42.815366 | 25.509649 | 36.563274 | H | 38.751124 | 28.945126 | 46.081433 |
| C  | 39.465247 | 25.639688 | 35.540250 | H | 40.555059 | 35.431286 | 38.397389 |
| H  | 39.594762 | 25.681449 | 34.453127 |   |           |           |           |
| H  | 38.556972 | 25.066000 | 35.742501 |   |           |           |           |

**<sup>3</sup>TS3:**

|    |           |           |           |   |           |           |           |
|----|-----------|-----------|-----------|---|-----------|-----------|-----------|
| C  | 43.311539 | 25.206311 | 42.952061 | O | 34.969814 | 29.120440 | 35.320842 |
| H  | 44.273332 | 25.498104 | 42.521073 | C | 42.095550 | 26.831820 | 35.148713 |
| H  | 43.242150 | 24.118209 | 42.852442 | C | 41.954097 | 25.798802 | 35.980963 |
| N  | 40.887906 | 25.474609 | 42.157315 | H | 43.045568 | 27.353781 | 35.072107 |
| H  | 40.495582 | 24.625868 | 42.572461 | H | 41.290545 | 27.208852 | 34.526030 |
| C  | 42.206745 | 25.904440 | 42.219477 | H | 42.820330 | 25.514051 | 36.574972 |
| C  | 40.179870 | 26.406539 | 41.470766 | C | 39.472088 | 25.637199 | 35.546669 |
| H  | 39.119473 | 26.325378 | 41.283769 | H | 39.600541 | 25.681788 | 34.459483 |
| N  | 40.959411 | 27.400304 | 41.075719 | H | 38.565432 | 25.060545 | 35.747775 |
| C  | 42.221818 | 27.092356 | 41.532134 | H | 39.323819 | 26.656027 | 35.917676 |
| H  | 43.054751 | 27.755567 | 41.347551 | C | 41.422769 | 20.816476 | 39.759912 |
| C  | 40.184932 | 34.528250 | 38.925565 | H | 40.483704 | 20.418374 | 39.360421 |
| H  | 39.495983 | 34.851864 | 39.719919 | H | 41.972356 | 19.985269 | 40.216282 |
| H  | 39.622823 | 33.930734 | 38.193729 | H | 41.184717 | 21.528155 | 40.560146 |
| O  | 41.281516 | 33.811399 | 39.443192 | C | 42.259322 | 21.501333 | 38.664866 |
| H  | 41.030773 | 32.885983 | 39.578585 | C | 43.628382 | 21.931299 | 39.239319 |
| C  | 38.439110 | 29.805301 | 45.472699 | H | 44.236148 | 22.451183 | 38.492087 |
| H  | 37.399714 | 29.682856 | 45.157787 | H | 44.196998 | 21.058458 | 39.576625 |
| H  | 38.466377 | 30.651828 | 46.165402 | H | 43.499284 | 22.598967 | 40.098956 |
| N  | 40.525034 | 30.740711 | 44.315870 | C | 38.744602 | 22.082018 | 35.751419 |
| H  | 40.987111 | 31.154800 | 45.126372 | N | 39.685195 | 22.780338 | 35.655348 |
| C  | 39.310503 | 30.061169 | 44.289458 | C | 40.910533 | 23.531498 | 35.672860 |
| C  | 41.043500 | 30.727174 | 43.066449 | H | 41.245001 | 23.617840 | 34.632598 |
| H  | 41.994404 | 31.167330 | 42.803541 | C | 40.687423 | 24.993582 | 36.237165 |
| N  | 40.224548 | 30.091759 | 42.234359 | C | 40.424931 | 24.942153 | 37.776229 |
| C  | 39.141787 | 29.684405 | 42.984933 | H | 39.416374 | 24.531701 | 37.909963 |
| H  | 38.326986 | 29.139280 | 42.534711 | H | 40.403916 | 25.971395 | 38.150382 |
| FE | 40.514442 | 29.458177 | 40.304818 | C | 41.405078 | 24.083183 | 38.612532 |
| CL | 42.624197 | 30.572175 | 40.283964 | H | 41.039149 | 24.047783 | 39.645794 |
| O  | 39.191476 | 28.667927 | 37.957476 | H | 42.398959 | 24.545728 | 38.653842 |
| O  | 40.592215 | 29.353695 | 38.582825 | C | 41.470324 | 22.687314 | 37.995783 |
| C  | 36.898657 | 28.267961 | 38.409121 | C | 41.958007 | 22.774583 | 36.522277 |
| C  | 38.298773 | 28.628104 | 38.888643 | H | 40.438531 | 22.316557 | 37.937007 |
| H  | 36.178778 | 28.640508 | 39.141747 | H | 42.870356 | 23.384614 | 36.465088 |
| H  | 36.806618 | 27.174489 | 38.409357 | C | 42.440240 | 20.657554 | 37.418729 |
| O  | 38.557025 | 28.904685 | 40.089118 | N | 42.837026 | 19.360054 | 37.180366 |
| C  | 37.919582 | 32.084614 | 38.711660 | C | 42.904917 | 19.191644 | 35.799419 |
| O  | 38.645081 | 31.923814 | 39.616106 | C | 43.204997 | 18.046544 | 35.054575 |
| O  | 37.192018 | 32.267995 | 37.816726 | C | 43.212361 | 18.151249 | 33.666359 |
| C  | 36.605136 | 28.825909 | 37.010031 | C | 42.929495 | 19.376020 | 33.027489 |
| C  | 35.140687 | 28.753486 | 36.519993 | C | 42.620643 | 20.513796 | 33.763345 |
| H  | 37.230898 | 28.317235 | 36.269109 | C | 42.591339 | 20.438807 | 35.168355 |
| H  | 36.898558 | 29.881584 | 36.973591 | C | 42.284846 | 21.339081 | 36.239344 |
| O  | 34.269861 | 28.356921 | 37.336489 | H | 42.818991 | 18.588280 | 37.850728 |



H 43.412635 17.106223 35.550500  
H 43.443051 17.275278 33.068294  
H 42.958567 19.433599 31.942977  
H 42.403052 21.450731 33.256747  
H 43.299061 25.388402 44.026655  
H 38.748010 28.947280 46.069731  
H 40.553401 35.417979 38.414998

**<sup>3</sup>Int3:**

C 43.369000 25.202399 42.988092  
H 44.344623 25.471889 42.574117  
H 43.273585 24.117132 42.885048  
N 40.973038 25.505186 42.129186  
H 40.569773 24.645674 42.506987  
C 42.290053 25.929355 42.246026  
C 40.283823 26.463117 41.463635  
H 39.232552 26.393972 41.229849  
N 41.078087 27.471736 41.141208  
C 42.328743 27.147499 41.615851  
H 43.165748 27.816088 41.477820  
C 40.188019 34.596436 39.019084  
H 39.549399 34.968103 39.833463  
H 39.578505 33.982382 38.344619  
O 41.289653 33.868441 39.517186  
H 41.020009 32.945810 39.615172  
C 38.411614 29.808055 45.402224  
H 37.371107 29.674273 45.095082  
H 38.435183 30.659788 46.088785  
N 40.484694 30.755266 44.243906  
H 40.944855 31.164796 45.057070  
C 39.275638 30.065896 44.213238  
C 41.009344 30.750391 42.999834  
H 41.962731 31.190721 42.746020  
N 40.197466 30.114056 42.159697  
C 39.113980 29.693574 42.905781  
H 38.304954 29.145321 42.447294  
FE 40.568669 29.376390 40.241291  
CL 42.724689 30.466343 40.381924  
O 39.076128 28.088279 37.988402  
O 40.886699 29.051646 38.652280  
C 36.772938 28.431166 38.506463  
C 38.265547 28.495671 38.842534  
H 36.195543 28.960555 39.266578  
H 36.463023 27.380464 38.531486

O 38.618725 29.006491 39.983133  
C 38.079789 31.710814 39.306346  
O 39.237070 31.784785 39.478247  
O 36.926948 31.698939 39.133953  
C 36.517151 28.998540 37.103463  
C 35.077028 28.887706 36.555535  
H 37.184699 28.496002 36.396822  
H 36.789382 30.062306 37.083842  
O 34.183235 28.480855 37.340481  
O 34.943773 29.226484 35.341962  
C 42.073683 26.809840 35.152992  
C 41.942394 25.756495 35.961181  
H 43.019615 27.340662 35.085164  
H 41.262285 27.194824 34.543794  
H 42.813190 25.465723 36.545837  
C 39.466079 25.568330 35.503645  
H 39.609373 25.621555 34.418252  
H 38.566807 24.975105 35.688879  
H 39.295225 26.577859 35.887232  
C 41.443965 20.754185 39.715558  
H 40.508766 20.349182 39.314036  
H 41.999169 19.927480 40.173413  
H 41.198232 21.463570 40.515590  
C 42.277417 21.448063 38.624087  
C 43.642132 21.886229 39.202623  
H 44.247323 22.413470 38.458433  
H 44.216954 21.016795 39.538357  
H 43.506051 22.550079 40.064356  
C 38.771041 22.016658 35.701398  
N 39.710104 22.716750 35.607530  
C 40.927213 23.480207 35.633857  
H 41.267489 23.572702 34.595872  
C 40.682612 24.936371 36.202742  
C 40.407161 24.871668 37.739307  
H 39.405052 24.441554 37.859660  
H 40.358899 25.897960 38.115816  
C 41.394078 24.023104 38.578314  
H 41.022568 23.977974 39.609846  
H 42.382151 24.497908 38.627411  
C 41.480667 22.630522 37.957568  
C 41.975532 22.730087 36.487517  
H 40.453195 22.249220 37.891110  
H 42.883332 23.347372 36.438387  
C 42.465446 20.610785 37.374546

N 42.854897 19.312137 37.128586  
C 42.917882 19.151065 35.746260  
C 43.201876 18.007644 34.993952  
C 43.204766 18.119022 33.606607  
C 42.932647 19.350205 32.975477  
C 42.637206 20.486603 33.718388  
C 42.611913 20.403966 35.123009  
C 42.312782 21.298915 36.199069  
H 42.836155 18.538676 37.796332  
H 43.397924 17.063559 35.485903  
H 43.421965 17.243102 33.003346  
H 42.957379 19.413996 31.891172  
H 42.425605 21.428063 33.217747  
H 43.340730 25.387086 44.061944  
H 38.731806 28.958735 46.005713  
H 40.552226 35.463544 38.468135

**<sup>5</sup>RC1:**

C 43.244385 25.297645 42.833588  
H 44.208787 25.572599 42.397310  
H 43.146737 24.213451 42.718671  
N 40.826252 25.634176 42.021275  
H 40.415799 24.786768 42.419434  
C 42.154743 26.033613 42.114002  
C 40.149555 26.581840 41.331032  
H 39.093262 26.531087 41.114194  
N 40.963146 27.566196 40.964116  
C 42.214125 27.226334 41.444080  
H 43.061231 27.875952 41.286094  
C 40.068365 34.535734 38.918459  
H 39.502961 34.923067 39.782048  
H 39.363126 34.018679 38.253059  
O 41.109224 33.660033 39.299354  
H 40.726912 32.763912 39.347930  
C 38.455501 29.856761 45.513196  
H 37.418573 29.748878 45.185132  
H 38.479323 30.679575 46.232956  
N 40.555077 30.822130 44.387601  
H 41.022450 31.218581 45.206744  
C 39.338302 30.147479 44.347574  
C 41.070801 30.835678 43.135512  
H 42.024690 31.275988 42.879559  
N 40.246691 30.227480 42.291541  
C 39.168655 29.801746 43.035712

H 38.348377 29.263181 42.584655  
FE 40.552616 29.577280 40.295701  
CL 42.872214 30.323450 40.258686  
O 40.123814 29.032275 37.154025  
O 40.770010 28.612722 38.102704  
C 36.354564 29.697471 38.696551  
C 37.747350 29.863233 39.218786  
H 35.761024 30.574283 38.982476  
H 35.899187 28.806745 39.131060  
O 38.326753 29.027488 39.919919  
C 38.560979 31.136306 38.830293  
O 39.769620 31.131670 39.281176  
O 38.033076 32.017752 38.151569  
C 36.364655 29.612582 37.153676  
C 35.009845 29.234818 36.496776  
H 37.106181 28.876990 36.814726  
H 36.669771 30.584216 36.761187  
O 34.068119 28.893860 37.252870  
O 35.013389 29.299490 35.234353  
C 42.033109 26.861747 35.070624  
C 41.889210 25.792710 35.856430  
H 42.981849 27.390142 35.026490  
H 41.237117 27.254490 34.445892  
H 42.750055 25.490330 36.449198  
C 39.434605 25.582219 35.302855  
H 39.615993 25.617865 34.223096  
H 38.527355 24.996306 35.468283  
H 39.248517 26.604661 35.646740  
C 41.283087 20.830579 39.642437  
H 40.362876 20.422189 39.210992  
H 41.821177 20.005234 40.122010  
H 41.009157 21.544007 40.429800  
C 42.154690 21.515926 38.575159  
C 43.495321 21.967845 39.197339  
H 44.125968 22.485789 38.467940  
H 44.059809 21.105598 39.567128  
H 43.325345 22.643961 40.043374  
C 38.749143 22.034614 35.560904  
N 39.684469 22.739340 35.459775  
C 40.898327 23.504686 35.513695  
H 41.272573 23.587609 34.486738  
C 40.626600 24.966457 36.056913  
C 40.292076 24.909150 37.582303  
H 39.291822 24.468072 37.669284

H 40.218962 25.936476 37.955969  
C 41.261018 24.085019 38.465889  
H 40.858149 24.050374 39.485891  
H 42.241655 24.571649 38.537037  
C 41.377098 22.685414 37.865196  
C 41.920619 22.767331 36.410793  
H 40.354815 22.297522 37.768446  
H 42.830051 23.383822 36.382661  
C 42.388981 20.662934 37.344154  
N 42.789153 19.362747 37.130520  
C 42.888335 19.178562 35.753247  
C 43.195404 18.022843 35.028218  
C 43.226369 18.109567 33.639233  
C 42.960849 19.327356 32.980095  
C 42.647840 20.476331 33.695566  
C 42.593709 20.418994 35.100555  
C 42.266104 21.331740 36.153661  
H 42.757822 18.598991 37.810366  
H 43.386748 17.087930 35.540318  
H 43.461146 17.224463 33.056367  
H 43.004566 19.371870 31.895748  
H 42.445045 21.407647 33.172756  
H 43.250528 25.464520 43.910705  
H 38.756518 28.977139 46.082160  
H 40.495948 35.400349 38.410835

**<sup>5</sup>TS1:**

C 43.249620 25.255923 42.887035  
H 44.213627 25.520391 42.443826  
H 43.136036 24.173412 42.774022  
N 40.830393 25.628375 42.083564  
H 40.413197 24.772380 42.457936  
C 42.163633 26.011093 42.184021  
C 40.160234 26.606213 41.431910  
H 39.104304 26.579409 41.209243  
N 40.984795 27.595258 41.103442  
C 42.232502 27.226965 41.560712  
H 43.089386 27.864717 41.414040  
C 40.064973 34.643167 39.088119  
H 39.539358 35.109402 39.934777  
H 39.331812 34.082246 38.495243  
O 41.093771 33.781078 39.534270  
H 40.722171 32.879959 39.542309  
C 38.451438 29.841947 45.557570

H 37.415631 29.731990 45.227115  
H 38.473475 30.661121 46.281186  
N 40.555091 30.810439 44.442357  
H 41.020000 31.209325 45.263276  
C 39.334443 30.140362 44.394818  
C 41.080269 30.823655 43.197459  
H 42.036120 31.262670 42.948178  
N 40.254215 30.217878 42.351172  
C 39.165299 29.798079 43.083211  
H 38.344609 29.277092 42.614165  
FE 40.489552 29.561475 40.371022  
CL 42.763555 30.244783 40.245661  
O 39.095072 28.944277 37.897109  
O 40.337160 28.747503 38.339540  
C 36.769158 29.271649 38.508986  
C 38.227467 29.508431 38.916372  
H 36.147749 29.921646 39.132864  
H 36.512014 28.240855 38.772699  
O 38.617764 29.109952 40.130087  
C 38.751823 31.164501 38.786241  
O 39.844557 31.276073 39.455121  
O 38.153219 31.997661 38.129889  
C 36.498335 29.531539 37.026428  
C 35.085392 29.193718 36.489325  
H 37.199603 28.948771 36.420242  
H 36.691176 30.586584 36.808000  
O 34.222879 28.772528 37.301580  
O 34.956418 29.368901 35.241502  
C 42.037090 26.842862 35.118356  
C 41.893011 25.796277 35.933493  
H 42.982096 27.376892 35.065814  
H 41.240570 27.215578 34.482338  
H 42.751213 25.514277 36.540308  
C 39.429670 25.587688 35.415852  
H 39.592096 25.622246 34.332973  
H 38.525067 25.001655 35.595839  
H 39.251708 26.609281 35.765884  
C 41.367915 20.828561 39.718801  
H 40.440766 20.414605 39.308005  
H 41.921390 20.007947 40.189277  
H 41.107426 21.542317 40.510349  
C 42.212219 21.516913 38.632217  
C 43.565267 21.971948 39.225009  
H 44.178047 22.493244 38.482828

|   |           |           |           |    |           |           |           |
|---|-----------|-----------|-----------|----|-----------|-----------|-----------|
| H | 44.140708 | 21.110716 | 39.580144 | N  | 41.149188 | 27.482768 | 41.027437 |
| H | 43.412467 | 22.645546 | 40.076431 | C  | 42.389063 | 27.141519 | 41.528494 |
| C | 38.751144 | 22.033215 | 35.657380 | H  | 43.240751 | 27.788035 | 41.378724 |
| N | 39.684945 | 22.740227 | 35.559411 | C  | 40.102423 | 34.392978 | 38.962508 |
| C | 40.897362 | 23.509597 | 35.598265 | H  | 39.519766 | 34.758533 | 39.822437 |
| H | 41.255253 | 23.596289 | 34.565892 | H  | 39.422792 | 33.871974 | 38.278756 |
| C | 40.632946 | 24.969941 | 36.149733 | O  | 41.136146 | 33.525390 | 39.369279 |
| C | 40.318540 | 24.908514 | 37.678510 | H  | 40.810189 | 32.611308 | 39.277340 |
| H | 39.323901 | 24.456401 | 37.773180 | C  | 38.471981 | 29.848905 | 45.554234 |
| H | 40.239327 | 25.935232 | 38.053916 | H  | 37.438571 | 29.741063 | 45.215025 |
| C | 41.302752 | 24.083266 | 38.544940 | H  | 38.487828 | 30.668757 | 46.278220 |
| H | 40.913818 | 24.042532 | 39.570357 | N  | 40.589298 | 30.807099 | 44.456828 |
| H | 42.283185 | 24.572006 | 38.604811 | H  | 41.048755 | 31.204570 | 45.280488 |
| C | 41.416487 | 22.684847 | 37.939018 | C  | 39.366759 | 30.143374 | 44.398588 |
| C | 41.935730 | 22.772065 | 36.476034 | C  | 41.120497 | 30.818015 | 43.211066 |
| H | 40.394687 | 22.291757 | 37.858162 | H  | 42.081668 | 31.249885 | 42.968750 |
| H | 42.842193 | 23.392230 | 36.434595 | N  | 40.303578 | 30.218939 | 42.355340 |
| C | 42.423504 | 20.665727 | 37.395619 | C  | 39.210815 | 29.803562 | 43.083223 |
| N | 42.819639 | 19.365554 | 37.172401 | H  | 38.393202 | 29.273750 | 42.616618 |
| C | 42.898694 | 19.185253 | 35.793371 | FE | 40.664689 | 29.487928 | 40.393011 |
| C | 43.195926 | 18.031359 | 35.060949 | CL | 42.953556 | 30.338088 | 40.294955 |
| C | 43.208489 | 18.122216 | 33.671858 | O  | 38.626638 | 30.424669 | 38.522914 |
| C | 42.934901 | 19.342187 | 33.019993 | O  | 39.942386 | 30.741917 | 39.038196 |
| C | 42.630665 | 20.488961 | 33.743184 | C  | 36.704245 | 29.005422 | 38.525445 |
| C | 42.594693 | 20.427601 | 35.148665 | C  | 38.066866 | 29.360625 | 39.087182 |
| C | 42.281939 | 21.337806 | 36.209150 | H  | 35.942292 | 29.514795 | 39.125652 |
| H | 42.795463 | 18.599069 | 37.848997 | H  | 36.568232 | 27.936896 | 38.711251 |
| H | 43.393965 | 17.094495 | 35.567091 | O  | 38.624271 | 28.728098 | 39.991487 |
| H | 43.434457 | 17.238898 | 33.082939 | C  | 36.814809 | 32.584561 | 38.687456 |
| H | 42.965994 | 19.389128 | 31.935217 | O  | 36.356279 | 32.066182 | 39.629381 |
| H | 42.420472 | 21.421746 | 33.226093 | O  | 37.248718 | 33.137531 | 37.752868 |
| H | 43.261325 | 25.429219 | 43.963091 | C  | 36.508935 | 29.333445 | 37.043306 |
| H | 38.756634 | 28.959986 | 46.120657 | C  | 35.098158 | 29.041108 | 36.469623 |
| H | 40.483226 | 35.461191 | 38.501633 | H  | 37.234292 | 28.771495 | 36.441699 |

**<sup>5</sup>Int2:**

|   |           |           |           |   |           |           |           |
|---|-----------|-----------|-----------|---|-----------|-----------|-----------|
| C | 43.378296 | 25.225569 | 42.965923 | O | 34.216176 | 28.636617 | 37.269430 |
| H | 44.357363 | 25.494826 | 42.560282 | O | 34.981861 | 29.245758 | 35.226525 |
| H | 43.285315 | 24.139400 | 42.866932 | C | 42.069557 | 26.830369 | 35.139185 |
| N | 40.985107 | 25.556735 | 42.089139 | C | 41.918060 | 25.799397 | 35.973093 |
| H | 40.561143 | 24.714019 | 42.483604 | H | 43.017686 | 27.358409 | 35.080906 |
| C | 42.313661 | 25.951432 | 42.202056 | H | 41.279292 | 27.192187 | 34.488799 |
| C | 40.324878 | 26.504972 | 41.384368 | H | 42.772587 | 25.526193 | 36.589002 |
| H | 39.271970 | 26.464395 | 41.151713 | C | 39.448690 | 25.605837 | 35.478021 |
|   |           |           |           | H | 39.598002 | 25.639977 | 34.393305 |

H 38.541375 25.027573 35.668847  
H 39.283295 26.629826 35.828430  
C 41.388876 20.807681 39.729532  
H 40.458384 20.400147 39.319760  
H 41.941574 19.981788 40.191465  
H 41.135131 21.516859 40.527205  
C 42.231336 21.500550 38.644210  
C 43.589353 21.944161 39.234246  
H 44.201116 22.469276 38.493926  
H 44.161990 21.076743 39.578505  
H 43.443870 22.610522 40.092414  
C 38.751105 22.053527 35.691387  
N 39.686580 22.759431 35.600328  
C 40.905338 23.519711 35.634462  
H 41.254055 23.611448 34.599459  
C 40.655651 24.978532 36.197613  
C 40.359387 24.912591 37.729803  
H 39.357146 24.481105 37.838488  
H 40.305886 25.937848 38.114309  
C 41.340357 24.070218 38.582212  
H 40.956706 24.025640 39.608734  
H 42.325151 24.549825 38.641714  
C 41.437743 22.677015 37.964352  
C 41.946988 22.771705 36.498496  
H 40.412561 22.291573 37.888885  
H 42.855197 23.389381 36.454984  
C 42.432933 20.658119 37.400411  
N 42.829746 19.360385 37.166507  
C 42.905454 19.189959 35.786244  
C 43.205335 18.042362 35.045168  
C 43.216585 18.143639 33.656849  
C 42.938673 19.367398 33.014143  
C 42.631661 20.508007 33.746188  
C 42.597580 20.436351 35.151203  
C 42.286385 21.338471 36.219162  
H 42.809219 18.589942 37.838604  
H 43.407903 17.102686 35.544257  
H 43.445846 17.265444 33.061558  
H 42.970025 19.422412 31.929658  
H 42.418780 21.444407 33.236387  
H 43.343230 25.412819 44.039131  
H 38.768618 28.966978 46.121929  
H 40.504640 35.273974 38.462373

**<sup>5</sup>TS3:**

C 43.312991 25.258149 42.913991  
H 44.292847 25.514569 42.501651  
H 43.201081 24.174329 42.807990  
N 40.922372 25.650484 42.034684  
H 40.480738 24.814971 42.422613  
C 42.259600 26.011252 42.159824  
C 40.292457 26.619229 41.327783  
H 39.243298 26.606066 41.076609  
N 41.143014 27.583058 40.985800  
C 42.369020 27.202302 41.495042  
H 43.240318 27.822722 41.361898  
C 40.141579 34.404302 38.992341  
H 39.549262 34.772909 39.845700  
H 39.469978 33.852813 38.323690  
O 41.197459 33.575965 39.418080  
H 40.887211 32.648699 39.344591  
C 38.458921 29.843512 45.546182  
H 37.426722 29.733401 45.204512  
H 38.472896 30.665235 46.267829  
N 40.575592 30.811551 44.463071  
H 41.029544 31.205711 45.292523  
C 39.357102 30.140834 44.393389  
C 41.118797 30.835947 43.226713  
H 42.079590 31.272754 42.993829  
N 40.306692 30.237444 42.363969  
C 39.208516 29.806011 43.076036  
H 38.398248 29.278867 42.595120  
FE 40.630819 29.640395 40.393677  
CL 42.994683 30.226203 40.402626  
O 38.520190 30.519038 38.489804  
O 40.217675 30.951279 39.325075  
C 36.764157 28.919803 38.545353  
C 38.120748 29.437213 39.020928  
H 35.999263 29.408481 39.160171  
H 36.708924 27.849377 38.759888  
O 38.776987 28.793463 39.907857  
C 36.803575 32.596641 38.702506  
O 36.309628 32.074054 39.624128  
O 37.259908 33.171501 37.791567  
C 36.509509 29.231155 37.067409  
C 35.095423 28.944081 36.512221  
H 37.230729 28.685589 36.445678  
H 36.711883 30.293209 36.888400

O 34.212627 28.561392 37.322100  
O 34.970384 29.143777 35.267888  
C 42.068447 26.833711 35.143870  
C 41.918460 25.799825 35.974674  
H 43.017278 27.360216 35.082579  
H 41.276021 27.198549 34.497957  
H 42.774913 25.521972 36.585916  
C 39.449448 25.606997 35.477949  
H 39.600164 25.640929 34.393415  
H 38.541602 25.029478 35.668010  
H 39.283971 26.631062 35.827784  
C 41.387200 20.808647 39.729564  
H 40.456515 20.401601 39.319793  
H 41.939023 19.982813 40.192600  
H 41.133717 21.518883 40.526347  
C 42.230460 21.500320 38.644274  
C 43.588441 21.943992 39.234542  
H 44.200331 22.469116 38.494328  
H 44.161012 21.076640 39.579049  
H 43.442685 22.610176 40.092806  
C 38.752548 22.053473 35.690730  
N 39.687535 22.760084 35.600051  
C 40.905781 23.520575 35.634642  
H 41.254689 23.613047 34.599822  
C 40.655686 24.979141 36.198499  
C 40.357672 24.912279 37.730377  
H 39.355916 24.479640 37.837634  
H 40.301662 25.937374 38.114899  
C 41.338950 24.069839 38.582804  
H 40.955027 24.024431 39.609293  
H 42.323512 24.549945 38.642715  
C 41.437470 22.676911 37.964062  
C 41.947475 22.771846 36.498360  
H 40.412585 22.291231 37.886745  
H 42.856036 23.388884 36.455002  
C 42.432455 20.657847 37.400623  
N 42.829356 19.360038 37.166994  
C 42.905627 19.189545 35.786677  
C 43.205594 18.041752 35.045944  
C 43.217234 18.142634 33.657553  
C 42.939478 19.366427 33.014618  
C 42.632282 20.507163 33.746371  
C 42.598014 20.435574 35.151378  
C 42.286378 21.338231 36.219193

H 42.808855 18.589676 37.839137  
H 43.407956 17.102230 35.545357  
H 43.446636 17.264296 33.062539  
H 42.970744 19.421146 31.930196  
H 42.419238 21.443116 33.236288  
H 43.295231 25.437054 43.989047  
H 38.758960 28.963775 46.115485  
H 40.524523 35.283988 38.475067

**<sup>5</sup>Int3:**

C 43.246446 25.363443 42.843274  
H 44.230938 25.596036 42.427624  
H 43.088097 24.290933 42.694691  
N 40.882546 25.825425 41.944456  
H 40.437968 24.970245 42.275742  
C 42.211224 26.182920 42.134194  
C 40.265585 26.829972 41.279040  
H 39.228859 26.822860 40.980809  
N 41.121401 27.816649 41.031820  
C 42.332720 27.418979 41.559402  
H 43.206442 28.044985 41.482812  
C 40.169029 34.545625 39.072517  
H 39.495418 34.938759 39.850970  
H 39.590696 33.902435 38.398233  
O 41.251473 33.840587 39.639878  
H 40.952322 32.920610 39.763121  
C 38.476585 29.839786 45.577709  
H 37.448474 29.738522 45.221433  
H 38.487593 30.659565 46.300580  
N 40.603859 30.812354 44.513910  
H 41.046358 31.224975 45.341512  
C 39.397357 30.125624 44.440776  
C 41.170831 30.808539 43.284948  
H 42.119945 31.270700 43.053296  
N 40.385447 30.167680 42.433431  
C 39.280858 29.744659 43.132333  
H 38.479718 29.197776 42.657891  
FE 40.602574 29.767383 40.412711  
CL 42.900489 30.262278 40.156025  
O 38.878139 30.373877 37.859454  
O 40.168536 31.298648 40.043321  
C 37.111158 28.769277 38.271043  
C 38.462165 29.441985 38.541639  
H 36.388611 29.153974 39.001457

H 37.194391 27.695142 38.464595  
O 39.140231 28.928092 39.562476  
C 36.988386 32.403241 38.691697  
O 36.582482 31.757512 39.577155  
O 37.366040 33.091725 37.823997  
C 36.644533 29.072912 36.849676  
C 35.181879 28.798459 36.433305  
H 37.287887 28.541869 36.136701  
H 36.821826 30.137596 36.664645  
O 34.368045 28.390709 37.301678  
O 34.953233 29.043891 35.211010  
C 42.053270 26.871885 35.132312  
C 41.912884 25.812436 35.931736  
H 43.002114 27.398654 35.075029  
H 41.252741 27.259090 34.509922  
H 42.777808 25.514357 36.521053  
C 39.448515 25.612849 35.419277  
H 39.609360 25.643233 34.336111  
H 38.540472 25.033657 35.603198  
H 39.275494 26.637534 35.763151  
C 41.362151 20.837710 39.713817  
H 40.434114 20.428109 39.300728  
H 41.912078 20.013675 40.182353  
H 41.103128 21.549755 40.507216  
C 42.210593 21.525261 38.630046  
C 43.564613 21.972293 39.226113  
H 44.179765 22.495333 38.487165  
H 44.136728 21.107171 39.576969  
H 43.414085 22.641237 40.081523  
C 38.752042 22.060136 35.659460  
N 39.685689 22.768227 35.565177  
C 40.904085 23.528616 35.600439  
H 41.259340 23.611898 34.566947  
C 40.650111 24.990892 36.151906  
C 40.342384 24.932917 37.682782  
H 39.340902 24.498378 37.785056  
H 40.281216 25.961359 38.058312  
C 41.319633 24.096857 38.546650  
H 40.931196 24.057541 39.572131  
H 42.304188 24.577457 38.606500  
C 41.421633 22.698687 37.938786  
C 41.939871 22.785093 36.476070  
H 40.396993 22.313125 37.859311  
H 42.849047 23.401373 36.435436

C 42.420162 20.676005 37.391942  
N 42.814059 19.375985 37.166078  
C 42.898883 19.199104 35.786975  
C 43.200333 18.047689 35.052102  
C 43.216871 18.143095 33.663296  
C 42.942086 19.364234 33.013860  
C 42.633731 20.508202 33.739429  
C 42.595079 20.442757 35.144589  
C 42.280352 21.350364 36.206456  
H 42.801657 18.610059 37.843373  
H 43.400850 17.109457 35.555090  
H 43.448347 17.262198 33.072973  
H 42.975722 19.414244 31.929291  
H 42.423120 21.442262 33.224850  
H 43.248795 25.497376 43.924996  
H 38.764609 28.955569 46.146276  
H 40.539243 35.401834 38.508679

#### **<sup>5</sup>Int4**

C 39.469357 22.586530 38.707591  
H 40.353395 22.657353 38.069957  
H 39.173050 21.534279 38.727670  
N 37.031648 23.337194 38.380786  
H 36.591455 22.640966 38.982624  
C 38.395748 23.458057 38.140599  
C 36.406192 24.372901 37.768378  
H 35.342951 24.547018 37.782380  
N 37.291788 25.146513 37.149924  
C 38.529429 24.579121 37.365726  
H 39.425488 25.028483 36.973646  
C 35.992800 31.694396 35.187357  
H 37.036630 31.390222 35.330493  
H 35.572822 31.908548 36.178751  
O 35.252276 30.724337 34.473179  
H 35.307514 29.870747 34.945245  
C 35.776157 27.552829 42.103279  
H 34.691492 27.499998 41.975622  
H 35.988430 28.427367 42.726938  
N 37.711519 28.236215 40.569471  
H 38.371056 28.606789 41.260024  
C 36.454652 27.676235 40.778950  
C 38.014916 28.133674 39.256397  
H 38.935319 28.475988 38.807912  
N 37.013118 27.559415 38.616789

|    |           |           |           |                                   |           |           |           |
|----|-----------|-----------|-----------|-----------------------------------|-----------|-----------|-----------|
| C  | 36.034859 | 27.271226 | 39.538977 | H                                 | 38.141833 | 25.096852 | 34.618582 |
| H  | 35.109079 | 26.798916 | 39.251703 | H                                 | 38.940989 | 25.601450 | 33.140665 |
| Cl | 39.134394 | 27.379976 | 36.085546 | C                                 | 37.369153 | 24.150067 | 32.829259 |
| Fe | 36.908779 | 27.166892 | 36.589316 | C                                 | 37.038453 | 24.535605 | 31.363819 |
| O  | 36.616885 | 28.721679 | 36.198188 | H                                 | 36.413465 | 23.895531 | 33.310197 |
| C  | 31.708301 | 27.275472 | 36.019907 | H                                 | 37.937028 | 24.988369 | 30.917332 |
| C  | 32.880891 | 26.337184 | 35.777842 | C                                 | 37.587041 | 22.273620 | 31.459075 |
| H  | 31.813870 | 28.162045 | 35.388462 | N                                 | 37.818251 | 21.137092 | 30.720540 |
| H  | 31.717670 | 27.643794 | 37.051845 | C                                 | 37.239087 | 21.316928 | 29.466868 |
| H  | 32.761855 | 25.847361 | 34.803490 | C                                 | 37.248660 | 20.490650 | 28.341480 |
| H  | 32.932883 | 25.540594 | 36.522756 | C                                 | 36.540958 | 20.912663 | 27.218861 |
| C  | 34.177560 | 27.112683 | 35.717034 | C                                 | 35.823993 | 22.123621 | 27.219801 |
| O  | 34.261928 | 28.160404 | 35.088174 | C                                 | 35.855178 | 22.976615 | 28.317266 |
| O  | 35.173791 | 26.514447 | 36.349146 | C                                 | 36.587017 | 22.595422 | 29.453409 |
| C  | 30.340776 | 26.666622 | 35.741531 | C                                 | 36.851812 | 23.183805 | 30.736085 |
| O  | 29.384564 | 27.502497 | 35.724762 | H                                 | 38.440479 | 20.373512 | 30.996627 |
| O  | 30.259501 | 25.433941 | 35.502351 | H                                 | 37.764874 | 19.537893 | 28.344411 |
| C  | 37.809926 | 27.964978 | 30.055563 | H                                 | 36.525198 | 20.280511 | 26.339892 |
| C  | 37.808481 | 27.431262 | 31.277640 | H                                 | 35.232575 | 22.389535 | 26.348067 |
| H  | 38.720445 | 28.387004 | 29.637926 | H                                 | 35.286562 | 23.903930 | 28.315272 |
| H  | 36.920093 | 28.040701 | 29.436552 | H                                 | 39.739666 | 22.837226 | 39.733335 |
| H  | 38.742490 | 27.414230 | 31.833597 | H                                 | 36.048838 | 32.641821 | 34.651342 |
| C  | 35.548872 | 28.049973 | 32.109862 | H                                 | 36.128564 | 26.697610 | 42.679886 |
| H  | 34.618381 | 27.715142 | 32.574132 | <b><sup>5</sup>TS<sub>H</sub></b> |           |           |           |
| H  | 35.924478 | 28.875665 | 32.718937 | C                                 | 39.511047 | 22.515570 | 38.749677 |
| H  | 35.348519 | 28.437284 | 31.107478 | H                                 | 40.384830 | 22.599835 | 38.100541 |
| C  | 37.923409 | 21.909531 | 33.968441 | H                                 | 39.239645 | 21.456830 | 38.789869 |
| H  | 38.267163 | 22.404249 | 34.883702 | N                                 | 37.058351 | 23.236203 | 38.474774 |
| H  | 36.856963 | 21.681879 | 34.074832 | H                                 | 36.635631 | 22.567204 | 39.120227 |
| H  | 38.464643 | 20.961611 | 33.881179 | C                                 | 38.412888 | 23.348072 | 38.175597 |
| C  | 38.173489 | 22.804493 | 32.744936 | C                                 | 36.404031 | 24.231476 | 37.829635 |
| C  | 39.686367 | 23.028753 | 32.565062 | H                                 | 35.342825 | 24.409478 | 37.889778 |
| H  | 39.897157 | 23.708030 | 31.732764 | N                                 | 37.257471 | 24.968877 | 37.123991 |
| H  | 40.187744 | 22.076870 | 32.362870 | C                                 | 38.508104 | 24.416965 | 37.327046 |
| H  | 40.120799 | 23.453180 | 33.474969 | H                                 | 39.384667 | 24.859477 | 36.882609 |
| C  | 33.748651 | 24.887031 | 32.310325 | C                                 | 35.964236 | 31.652800 | 35.239886 |
| N  | 34.753435 | 25.259035 | 31.835404 | H                                 | 37.007836 | 31.332977 | 35.351822 |
| C  | 36.008553 | 25.671173 | 31.281172 | H                                 | 35.581426 | 31.882373 | 36.242722 |
| H  | 35.818824 | 25.939146 | 30.235827 | O                                 | 35.192848 | 30.670414 | 34.571617 |
| C  | 36.585010 | 26.920775 | 32.035682 | H                                 | 35.355460 | 29.822700 | 35.036486 |
| C  | 36.992383 | 26.518135 | 33.470013 | C                                 | 35.790279 | 27.567524 | 42.085440 |
| H  | 36.079122 | 26.268229 | 34.019732 | H                                 | 34.706898 | 27.507049 | 41.955254 |
| H  | 37.421920 | 27.403541 | 33.945422 | H                                 | 35.988772 | 28.432725 | 42.727607 |
| C  | 37.968643 | 25.334720 | 33.566895 | N                                 | 37.725132 | 28.283714 | 40.558174 |



|    |           |           |           |                         |           |           |           |
|----|-----------|-----------|-----------|-------------------------|-----------|-----------|-----------|
| H  | 38.399958 | 28.621559 | 41.251615 | C                       | 36.452188 | 26.934886 | 32.084748 |
| C  | 36.458392 | 27.735478 | 40.763762 | C                       | 36.664995 | 26.397751 | 33.478684 |
| C  | 38.001240 | 28.249361 | 39.240576 | H                       | 35.737656 | 26.205365 | 34.019725 |
| H  | 38.930876 | 28.579256 | 38.801478 | H                       | 36.858739 | 27.769769 | 34.326100 |
| N  | 36.967411 | 27.739383 | 38.582844 | C                       | 37.731660 | 25.360561 | 33.681532 |
| C  | 36.007234 | 27.409503 | 39.516346 | H                       | 37.824459 | 25.078739 | 34.731090 |
| H  | 35.076794 | 26.961474 | 39.209760 | H                       | 38.709550 | 25.712339 | 33.342082 |
| Cl | 39.209868 | 27.312298 | 36.294673 | C                       | 37.252626 | 24.164363 | 32.842410 |
| Fe | 36.854326 | 27.103039 | 36.636982 | C                       | 37.025468 | 24.578318 | 31.365231 |
| O  | 36.550700 | 28.322181 | 35.333347 | H                       | 36.272116 | 23.859612 | 33.232150 |
| C  | 31.525249 | 27.415946 | 36.227016 | H                       | 37.944324 | 25.050287 | 30.989455 |
| C  | 32.754101 | 26.534025 | 36.150977 | C                       | 37.604765 | 22.325427 | 31.470321 |
| H  | 31.694148 | 28.345616 | 35.677647 | N                       | 37.839160 | 21.176667 | 30.753393 |
| H  | 31.341806 | 27.726066 | 37.260737 | C                       | 37.276938 | 21.339970 | 29.490220 |
| H  | 32.903806 | 26.181556 | 35.120521 | C                       | 37.279337 | 20.484830 | 28.387409 |
| H  | 32.636016 | 25.621818 | 36.742473 | C                       | 36.579503 | 20.885701 | 27.251730 |
| C  | 34.011180 | 27.264025 | 36.573195 | C                       | 35.875208 | 22.103162 | 27.220274 |
| O  | 34.066314 | 28.486661 | 36.664880 | C                       | 35.911619 | 22.983611 | 28.295343 |
| O  | 35.022747 | 26.453247 | 36.821497 | C                       | 36.639635 | 22.625319 | 29.442149 |
| C  | 30.247133 | 26.772299 | 35.717803 | C                       | 36.894417 | 23.231146 | 30.716755 |
| O  | 29.268693 | 27.571797 | 35.567774 | H                       | 38.447858 | 20.408099 | 31.047952 |
| O  | 30.240544 | 25.538927 | 35.465473 | H                       | 37.782097 | 19.525783 | 28.420648 |
| C  | 37.913678 | 27.900013 | 30.243108 | H                       | 36.557561 | 20.230536 | 26.389425 |
| C  | 37.737122 | 27.510829 | 31.505153 | H                       | 35.284734 | 22.349006 | 26.342385 |
| H  | 38.838082 | 28.386356 | 29.942976 | H                       | 35.343590 | 23.911077 | 28.271089 |
| H  | 37.154933 | 27.785024 | 29.474133 | H                       | 39.784955 | 22.790790 | 39.768154 |
| H  | 38.534946 | 27.685464 | 32.223248 | H                       | 36.026479 | 32.591673 | 34.689695 |
| C  | 35.396349 | 28.048002 | 32.092740 | H                       | 36.144648 | 26.711416 | 42.659520 |
| H  | 34.435716 | 27.681339 | 32.466229 | <b><sup>5</sup>Int5</b> |           |           |           |
| H  | 35.707045 | 28.876691 | 32.733344 | C                       | 39.527780 | 22.530381 | 38.768020 |
| H  | 35.280147 | 28.438407 | 31.078683 | H                       | 40.411679 | 22.627936 | 38.134411 |
| C  | 37.825031 | 21.936854 | 33.986521 | H                       | 39.267012 | 21.469253 | 38.791402 |
| H  | 38.113065 | 22.424211 | 34.924542 | N                       | 37.069394 | 23.204276 | 38.439875 |
| H  | 36.761077 | 21.682792 | 34.035191 | H                       | 36.643102 | 22.506541 | 39.053110 |
| H  | 38.395468 | 21.004967 | 33.911385 | C                       | 38.428719 | 23.358492 | 38.190172 |
| C  | 38.114070 | 22.853211 | 32.790909 | C                       | 36.414010 | 24.203722 | 37.795922 |
| C  | 39.621829 | 23.143354 | 32.700122 | H                       | 35.345989 | 24.354874 | 37.810715 |
| H  | 39.851796 | 23.842432 | 31.890334 | N                       | 37.271740 | 24.981694 | 37.145719 |
| H  | 40.175559 | 22.216936 | 32.516846 | C                       | 38.524748 | 24.458523 | 37.379017 |
| H  | 39.988423 | 23.573766 | 33.637230 | H                       | 39.405624 | 24.923147 | 36.965175 |
| C  | 33.696076 | 24.833383 | 32.119980 | C                       | 36.056881 | 31.757295 | 35.169902 |
| N  | 34.694029 | 25.242893 | 31.660426 | H                       | 37.120933 | 31.483216 | 35.233627 |
| C  | 35.979053 | 25.692484 | 31.221226 | H                       | 35.715227 | 31.982118 | 36.189752 |
| H  | 35.876537 | 26.000072 | 30.176579 | O                       | 35.292341 | 30.748779 | 34.542604 |

H 35.463812 29.927297 35.055583  
C 35.796123 27.526191 42.166036  
H 34.711873 27.477432 42.036746  
H 36.010813 28.403294 42.784561  
N 37.738574 28.184100 40.626970  
H 38.394284 28.572834 41.311797  
C 36.478086 27.632157 40.843450  
C 38.049788 28.048777 39.320856  
H 38.972215 28.385302 38.870220  
N 37.047179 27.460694 38.689285  
C 36.062640 27.199866 39.613071  
H 35.137005 26.726745 39.323836  
Cl 39.064029 27.369257 36.062217  
Fe 36.818139 27.156384 36.669825  
O 36.480242 28.948179 36.275958  
C 31.667272 27.238628 35.998867  
C 32.771274 26.190735 35.964295  
H 31.862226 27.989726 35.226148  
H 31.662917 27.784835 36.948601  
H 32.591973 25.523191 35.114397  
H 32.780392 25.569401 36.862872  
C 34.112357 26.843873 35.742571  
O 34.289734 27.663899 34.848852  
O 35.063009 26.445805 36.571379  
C 30.270781 26.683127 35.747416  
O 29.346190 27.554367 35.731164  
O 30.139387 25.455404 35.503566  
C 37.823163 27.943081 30.029801  
C 37.821179 27.398160 31.246716  
H 38.737712 28.345994 29.602166  
H 36.926986 28.045096 29.424092  
H 38.755025 27.343281 31.797949  
C 35.557345 28.059454 32.063020  
H 34.626532 27.732990 32.527645  
H 35.939205 28.883443 32.669554  
H 35.375096 28.440958 31.054569  
C 37.881306 21.891010 33.967787  
H 38.213597 22.376505 34.892170  
H 36.813781 21.662836 34.055334  
H 38.425431 20.944538 33.875798  
C 38.143505 22.798759 32.756919  
C 39.656096 23.040455 32.605218  
H 39.877562 23.733006 31.787340  
H 40.168224 22.095306 32.395971

H 40.078458 23.453239 33.526491  
C 33.745077 24.915043 32.329504  
N 34.740692 25.260124 31.816187  
C 35.995861 25.659152 31.255263  
H 35.812980 25.921073 30.207675  
C 36.580642 26.919600 32.011979  
C 36.968955 26.499834 33.405173  
H 36.474570 27.020590 34.214249  
H 37.323761 29.422675 36.289948  
C 37.869329 25.323253 33.621093  
H 37.951066 25.087389 34.682244  
H 38.887416 25.551679 33.271990  
C 37.315761 24.132275 32.833298  
C 37.026582 24.528471 31.363034  
H 36.348766 23.861055 33.276922  
H 37.934962 24.983633 30.939641  
C 37.586662 22.269502 31.456858  
N 37.826088 21.132788 30.720514  
C 37.255255 21.310759 29.462823  
C 37.267263 20.480625 28.340649  
C 36.562426 20.899469 27.214026  
C 35.846451 22.110326 27.208899  
C 35.875078 22.967435 28.302992  
C 36.604437 22.589918 29.442008  
C 36.860192 23.179404 30.725037  
H 38.446926 20.369273 31.000703  
H 37.782878 19.527670 28.351120  
H 36.549256 20.264629 26.336387  
H 35.255796 22.373062 26.336130  
H 35.305861 23.894191 28.297593  
H 39.785691 22.798898 39.792445  
H 36.074206 32.700797 34.624402  
H 36.143575 26.673208 42.748929

<sup>5</sup>TS<sub>Cl</sub>

C 39.526113 22.535719 38.766862  
H 40.407990 22.632766 38.130251  
H 39.266765 21.473839 38.790526  
N 37.066312 23.198723 38.446982  
H 36.646107 22.495898 39.058431  
C 38.423182 23.363775 38.194495  
C 36.402421 24.197570 37.810411  
H 35.333331 24.336784 37.830711  
N 37.251416 24.985765 37.163357  
C 38.509000 24.470531 37.389295

H 39.385620 24.940029 36.970989  
C 36.057947 31.759956 35.174808  
H 37.122901 31.488747 35.238569  
H 35.716358 31.985992 36.194232  
O 35.292875 30.751189 34.549792  
H 35.463259 29.931918 35.067767  
C 35.805715 27.523970 42.153864  
H 34.721579 27.477901 42.021665  
H 36.021272 28.403126 42.769281  
N 37.746435 28.183418 40.611348  
H 38.402042 28.573191 41.295865  
C 36.491120 27.624462 40.831466  
C 38.051077 28.055124 39.301377  
H 38.970261 28.404345 38.854255  
N 37.049307 27.467471 38.667551  
C 36.076509 27.189915 39.601596  
H 35.149504 26.715780 39.316813  
Cl 38.848425 27.249922 35.642705  
Fe 36.765303 27.164491 36.645163  
O 36.450661 28.977181 36.311448  
C 31.647386 27.246266 36.002686  
C 32.746135 26.194827 35.975554  
H 31.849372 27.994978 35.229258  
H 31.639694 27.795337 36.950488  
H 32.570314 25.521947 35.129463  
H 32.752044 25.579295 36.878018  
C 34.089413 26.843344 35.761927  
O 34.285477 27.668906 34.877096  
O 35.029181 26.423647 36.589744  
C 30.252853 26.692775 35.745325  
O 29.328909 27.564546 35.726909  
O 30.121306 25.464982 35.501839  
C 37.835964 27.933871 30.059922  
C 37.853860 27.409336 31.286752  
H 38.743004 28.336618 29.616286  
H 36.932815 28.019708 29.461521  
H 38.793870 27.369844 31.826470  
C 35.592807 28.055298 32.114482  
H 34.660215 27.726637 32.573961  
H 35.960082 28.897499 32.703664  
H 35.407609 28.413600 31.097098  
C 37.878152 21.884778 33.975390  
H 38.210512 22.371462 34.899174  
H 36.809571 21.661176 34.062238

H 38.419889 20.936834 33.886405  
C 38.144603 22.790180 32.764475  
C 39.657783 23.030508 32.613614  
H 39.877624 23.725474 31.797220  
H 40.171478 22.086915 32.402958  
H 40.078731 23.443792 33.535216  
C 33.768970 24.934918 32.364723  
N 34.766306 25.276592 31.852017  
C 36.025670 25.674008 31.298556  
H 35.842484 25.959633 30.257492  
C 36.631505 26.924679 32.075735  
C 37.065974 26.513910 33.475914  
H 36.578719 27.038620 34.280328  
H 37.307225 29.425502 36.266671  
C 37.912878 25.291361 33.639882  
H 38.003344 25.024054 34.689760  
H 38.928964 25.501450 33.278365  
C 37.327066 24.127406 32.843582  
C 37.039527 24.529863 31.379613  
H 36.358473 23.865779 33.290371  
H 37.950191 24.978189 30.953877  
C 37.585312 22.268605 31.464151  
N 37.823357 21.132983 30.727108  
C 37.254282 21.313374 29.469622  
C 37.267809 20.482160 28.348741  
C 36.565221 20.900262 27.220842  
C 35.850109 22.111565 27.214623  
C 35.877055 22.969680 28.308446  
C 36.604945 22.594055 29.449394  
C 36.860320 23.182812 30.734504  
H 38.443098 20.368592 31.006982  
H 37.782610 19.528798 28.361153  
H 36.553196 20.264212 26.344002  
H 35.260687 22.372508 26.340424  
H 35.306804 23.895864 28.299231  
H 39.785389 22.800088 39.792021  
H 36.074148 32.702182 34.627072  
H 36.148900 26.672560 42.741565  
**<sup>5</sup>TS<sub>OH</sub>**  
C 39.558110 22.472743 38.793334  
H 40.436825 22.573855 38.153612  
H 39.318978 21.407739 38.841875  
N 37.083008 23.099602 38.460869  
H 36.661040 22.407912 39.086336

|    |           |           |           |   |           |           |           |
|----|-----------|-----------|-----------|---|-----------|-----------|-----------|
| C  | 38.440603 | 23.262740 | 38.202255 | H | 35.906208 | 28.978558 | 32.700343 |
| C  | 36.414604 | 24.080732 | 37.809022 | H | 35.376029 | 28.492591 | 31.086912 |
| H  | 35.346293 | 24.226040 | 37.828614 | C | 37.851508 | 21.965899 | 34.046439 |
| N  | 37.266077 | 24.855421 | 37.144380 | H | 38.179595 | 22.439262 | 34.978169 |
| C  | 38.526405 | 24.348016 | 37.375169 | H | 36.783399 | 21.736021 | 34.124155 |
| H  | 39.400562 | 24.819692 | 36.957050 | H | 38.396189 | 21.020228 | 33.946484 |
| C  | 36.074824 | 31.699801 | 35.161780 | C | 38.121486 | 22.884550 | 32.845670 |
| H  | 37.139149 | 31.424446 | 35.211213 | C | 39.634085 | 23.126283 | 32.701030 |
| H  | 35.739148 | 31.908790 | 36.187820 | H | 39.856173 | 23.819528 | 31.883973 |
| O  | 35.303452 | 30.704211 | 34.520888 | H | 40.148249 | 22.182039 | 32.491314 |
| H  | 35.546826 | 29.837216 | 34.918326 | H | 40.053287 | 23.538596 | 33.623797 |
| C  | 35.781061 | 27.539644 | 42.105391 | C | 33.736059 | 24.971414 | 32.401369 |
| H  | 34.695130 | 27.489034 | 41.991229 | N | 34.729800 | 25.327181 | 31.891671 |
| H  | 36.002696 | 28.420270 | 42.717213 | C | 35.986320 | 25.737848 | 31.343197 |
| N  | 37.704175 | 28.194750 | 40.543046 | H | 35.808258 | 26.010541 | 30.297821 |
| H  | 38.364490 | 28.576533 | 41.227250 | C | 36.566284 | 27.002594 | 32.108092 |
| C  | 36.443264 | 27.644817 | 40.770377 | C | 36.925884 | 26.620280 | 33.527924 |
| C  | 38.006191 | 28.056752 | 39.235198 | H | 36.380814 | 27.109851 | 34.292548 |
| H  | 38.934741 | 28.373337 | 38.782358 | H | 37.457746 | 28.882153 | 35.717644 |
| N  | 36.998502 | 27.466686 | 38.606727 | C | 37.819164 | 25.419396 | 33.723005 |
| C  | 36.015393 | 27.216628 | 39.541561 | H | 37.898648 | 25.145770 | 34.774299 |
| H  | 35.089926 | 26.737972 | 39.261040 | H | 38.842488 | 25.654329 | 33.394326 |
| Cl | 39.175750 | 27.244886 | 36.212233 | C | 37.288351 | 24.221399 | 32.915516 |
| Fe | 36.825747 | 26.910151 | 36.615431 | C | 37.014888 | 24.608339 | 31.442855 |
| O  | 36.602242 | 28.445135 | 35.583209 | H | 36.317437 | 23.940711 | 33.344519 |
| C  | 31.628192 | 27.188612 | 36.038670 | H | 37.925509 | 25.061617 | 31.024283 |
| C  | 32.695756 | 26.102944 | 36.063011 | C | 37.576051 | 22.351708 | 31.541246 |
| H  | 31.863891 | 27.901557 | 35.241229 | N | 37.821885 | 21.209393 | 30.813871 |
| H  | 31.622655 | 27.772521 | 36.965220 | C | 37.256844 | 21.376018 | 29.552604 |
| H  | 32.483788 | 25.392465 | 35.256759 | C | 37.271744 | 20.528484 | 28.442585 |
| H  | 32.698207 | 25.538030 | 36.997771 | C | 36.575615 | 20.932608 | 27.305127 |
| C  | 34.049664 | 26.699456 | 35.775562 | C | 35.864231 | 22.146155 | 27.280884 |
| O  | 34.206694 | 27.463786 | 34.833185 | C | 35.885066 | 23.016430 | 28.365680 |
| O  | 35.014965 | 26.312778 | 36.600101 | C | 36.606689 | 22.655427 | 29.516176 |
| C  | 30.223208 | 26.672004 | 35.766971 | C | 36.853352 | 23.256699 | 30.799543 |
| O  | 29.320670 | 27.565869 | 35.732944 | H | 38.437798 | 20.442795 | 31.096242 |
| O  | 30.065290 | 25.448252 | 35.518834 | H | 37.783905 | 19.573318 | 28.468740 |
| C  | 37.834976 | 27.944759 | 30.103348 | H | 36.563959 | 20.284151 | 26.436351 |
| C  | 37.815355 | 27.459408 | 31.346125 | H | 35.279308 | 22.397758 | 26.400852 |
| H  | 38.755666 | 28.328922 | 29.671759 | H | 35.313326 | 23.941302 | 28.341482 |
| H  | 36.947552 | 28.013676 | 29.480071 | H | 39.809013 | 22.771109 | 39.811220 |
| H  | 38.741825 | 27.430429 | 31.911231 | H | 36.083493 | 32.651686 | 34.630831 |
| C  | 35.539171 | 28.138127 | 32.109209 | H | 36.133465 | 26.692555 | 42.693878 |
| H  | 34.602755 | 27.812816 | 32.562951 |   |           |           |           |

**<sup>5</sup>P<sub>Cl</sub>**

|    |           |           |           |   |           |           |           |
|----|-----------|-----------|-----------|---|-----------|-----------|-----------|
| C  | 39.411145 | 22.643839 | 38.713602 | C | 38.064974 | 27.278803 | 31.860275 |
| H  | 40.258930 | 22.808304 | 38.044322 | H | 38.862172 | 28.216826 | 30.158932 |
| H  | 39.190390 | 21.572477 | 38.684870 | H | 37.198434 | 27.453988 | 29.916269 |
| N  | 36.922613 | 23.222525 | 38.584697 | H | 38.928463 | 27.559499 | 32.455391 |
| H  | 36.574546 | 22.493283 | 39.211614 | C | 35.891059 | 27.705939 | 32.960974 |
| C  | 38.247893 | 23.457998 | 38.244652 | H | 35.067399 | 27.296894 | 33.545897 |
| C  | 36.170665 | 24.213408 | 38.042491 | H | 36.332474 | 28.522745 | 33.534578 |
| H  | 35.108366 | 24.323418 | 38.190863 | H | 35.516690 | 28.123458 | 32.022032 |
| N  | 36.925737 | 25.057781 | 37.355003 | C | 38.196201 | 21.383227 | 33.843387 |
| C  | 38.220156 | 24.598137 | 37.478018 | H | 38.656589 | 21.745974 | 34.768292 |
| H  | 39.047619 | 25.122152 | 37.024424 | H | 37.130415 | 21.217455 | 34.028270 |
| C  | 35.996327 | 31.889996 | 35.218643 | H | 38.652552 | 20.418852 | 33.598563 |
| H  | 37.055949 | 31.638029 | 35.375469 | C | 38.398457 | 22.385315 | 32.701407 |
| H  | 35.588536 | 32.158163 | 36.205491 | C | 39.897227 | 22.588379 | 32.427118 |
| O  | 35.283888 | 30.854607 | 34.586058 | H | 40.065357 | 23.351074 | 31.660485 |
| H  | 35.430407 | 30.046683 | 35.174487 | H | 40.347740 | 21.656233 | 32.080421 |
| C  | 35.831927 | 27.578131 | 42.233275 | H | 40.413678 | 22.895666 | 33.340523 |
| H  | 34.747127 | 27.541170 | 42.105079 | C | 33.979720 | 24.679115 | 32.648552 |
| H  | 36.055430 | 28.432050 | 42.880469 | N | 35.027518 | 25.046124 | 32.271846 |
| N  | 37.753917 | 28.259711 | 40.652065 | C | 36.288345 | 25.482795 | 31.757729 |
| H  | 38.451611 | 28.603283 | 41.317010 | H | 36.075629 | 25.919484 | 30.778279 |
| C  | 36.492800 | 27.727476 | 40.904584 | C | 36.941607 | 26.621164 | 32.642341 |
| C  | 37.979785 | 28.183330 | 39.316798 | C | 37.462594 | 25.955454 | 33.947138 |
| H  | 38.893919 | 28.525441 | 38.852692 | H | 36.599263 | 25.650161 | 34.535475 |
| N  | 36.935726 | 27.657862 | 38.702826 | H | 36.298289 | 29.537793 | 36.945245 |
| C  | 36.004962 | 27.371723 | 39.679650 | C | 38.417211 | 24.789095 | 33.776627 |
| H  | 35.051557 | 26.936617 | 39.423475 | H | 38.702033 | 24.410909 | 34.762063 |
| Cl | 38.319671 | 27.162836 | 35.060632 | H | 39.326238 | 25.107991 | 33.258254 |
| Fe | 36.163204 | 27.148425 | 36.753151 | C | 37.674874 | 23.737535 | 32.978391 |
| O  | 35.910954 | 28.987147 | 36.255659 | C | 37.265018 | 24.305870 | 31.603053 |
| C  | 31.630719 | 26.749122 | 36.188315 | H | 36.745245 | 23.489931 | 33.508752 |
| C  | 32.559325 | 25.543207 | 36.016488 | H | 38.146533 | 24.774498 | 31.142957 |
| H  | 32.004778 | 27.606978 | 35.616315 | C | 37.700454 | 22.025626 | 31.420555 |
| H  | 31.625824 | 27.068530 | 37.234456 | N | 37.843982 | 20.963804 | 30.565722 |
| H  | 32.529591 | 25.164253 | 34.996569 | C | 37.212306 | 21.292592 | 29.369853 |
| H  | 32.248883 | 24.738887 | 36.688597 | C | 37.131804 | 20.579848 | 28.173017 |
| C  | 33.950696 | 25.994665 | 36.335651 | C | 36.382300 | 21.134368 | 27.139303 |
| O  | 34.242487 | 26.335785 | 37.527394 | C | 35.724489 | 22.368206 | 27.296838 |
| O  | 34.804785 | 26.114954 | 35.401233 | C | 35.847295 | 23.109666 | 28.467067 |
| C  | 30.201670 | 26.479100 | 35.744502 | C | 36.615414 | 22.591038 | 29.521402 |
| O  | 29.414370 | 27.476253 | 35.752596 | C | 36.967696 | 23.037487 | 30.842838 |
| O  | 29.911473 | 25.314469 | 35.361955 | H | 38.461246 | 20.171185 | 30.747220 |
| C  | 38.035360 | 27.650355 | 30.579957 | H | 37.613982 | 19.616191 | 28.057883 |
|    |           |           |           | H | 36.293997 | 20.591258 | 26.205577 |

H 35.106080 22.741922 26.486921  
H 35.325380 24.056998 28.580268  
H 39.706388 22.850768 39.742231  
H 36.045943 32.811318 34.638323  
H 36.171854 26.702095 42.785613

**<sup>5</sup>P<sub>OH</sub>**

C 39.562432 22.510701 38.776489  
H 40.435112 22.630109 38.131405  
H 39.324832 21.443096 38.794464  
N 37.086562 23.128836 38.515668  
H 36.692938 22.421935 39.142180  
C 38.432420 23.318311 38.225064  
C 36.386241 24.122856 37.915245  
H 35.318595 24.253722 37.991229  
N 37.201799 24.922850 37.242871  
C 38.477084 24.430978 37.425256  
H 39.330653 24.929511 36.992150  
C 36.003231 31.649998 35.209487  
H 37.051111 31.390832 35.395508  
H 35.531732 31.831350 36.182213  
O 35.334634 30.639017 34.464162  
H 35.742503 29.778105 34.650274  
C 35.768836 27.544596 42.111342  
H 34.684701 27.482587 41.987243  
H 35.973163 28.409619 42.750820  
N 37.693192 28.258592 40.577163  
H 38.366025 28.604831 41.266664  
C 36.433918 27.703012 40.786694  
C 37.967740 28.204190 39.253327  
H 38.895493 28.540340 38.813845  
N 36.946555 27.674678 38.598804  
C 35.986192 27.361586 39.539007  
H 35.053262 26.910532 39.238357  
Cl 39.067254 27.717970 36.214341  
Fe 36.755766 26.940247 36.615738  
O 36.804405 27.693588 34.460831  
C 31.559174 27.280253 36.222583  
C 32.512524 26.203482 36.755032  
H 31.973332 27.705515 35.299903  
H 31.431594 28.115374 36.915594  
H 32.081418 25.236665 36.471639  
H 32.606322 26.248856 37.843159  
C 33.868984 26.320449 36.095153

O 33.964142 26.187717 34.870402  
O 34.858508 26.586032 36.901562  
C 30.180967 26.754406 35.822266  
O 29.282864 27.644637 35.685253  
O 30.049701 25.530092 35.567425  
C 37.991194 27.965475 30.290234  
C 37.776708 27.605480 31.556703  
H 38.920420 28.452669 30.005783  
H 37.254357 27.824815 29.504496  
H 38.560984 27.801373 32.285649  
C 35.417098 28.132863 32.033112  
H 34.474168 27.796115 32.474253  
H 35.748651 29.022344 32.569243  
H 35.277141 28.419295 30.986738  
C 37.695255 22.054030 34.163480  
H 37.944736 22.555760 35.104787  
H 36.623274 21.832018 34.159403  
H 38.242587 21.104405 34.141911  
C 38.073364 22.941875 32.967360  
C 39.589830 23.198900 32.965352  
H 39.879060 23.881096 32.160454  
H 40.138265 22.259922 32.830466  
H 39.908206 23.637409 33.916491  
C 33.735267 24.869818 32.036256  
N 34.744176 25.319918 31.640441  
C 36.046430 25.780552 31.266136  
H 35.995789 26.062436 30.210784  
C 36.479696 27.032113 32.105927  
C 36.620835 26.562259 33.568116  
H 35.648830 26.179223 33.880259  
H 37.757078 27.907738 34.518435  
C 37.679811 25.471417 33.784149  
H 37.720465 25.217089 34.845158  
H 38.680652 25.809201 33.495733  
C 37.234181 24.272318 32.956847  
C 37.080427 24.662876 31.468802  
H 36.234466 23.984463 33.308933  
H 38.020492 25.122159 31.130386  
C 37.623073 22.402277 31.629619  
N 37.842123 21.229345 30.941949  
C 37.315723 21.380461 29.662549  
C 37.309042 20.496862 28.582031  
C 36.643676 20.890953 27.422483  
C 35.980430 22.129621 27.347663

C 36.024373 23.034246 28.402021  
C 36.719913 22.682211 29.569799  
C 36.962864 23.309186 30.834911  
H 38.434726 20.453696 31.250009  
H 37.775790 19.521002 28.649648  
H 36.610867 20.213488 26.577322  
H 35.408737 22.369741 26.456352  
H 35.479757 23.974425 28.348780  
H 39.823240 22.772960 39.801801  
H 36.051293 32.598300 34.674249  
H 36.127290 26.686514 42.679912

### <sup>3</sup>Int4

C 43.205133 25.436473 42.827133  
H 44.175866 25.698651 42.397321  
H 43.071102 24.361474 42.671595  
N 40.818705 25.771935 41.949907  
H 40.433632 24.884508 42.276712  
C 42.122282 26.218074 42.142335  
C 40.121716 26.726650 41.296578  
H 39.105380 26.651202 40.929780  
N 40.917357 27.768830 41.068088  
C 42.162291 27.467457 41.586223  
H 42.977229 28.169757 41.525625  
C 40.196004 34.442192 39.050587  
H 39.564570 34.795959 39.876973  
H 39.584170 33.818149 38.383830  
O 41.325296 33.736931 39.526749  
H 41.110844 32.800709 39.640165  
C 38.411188 29.893402 45.478269  
H 37.371039 29.781949 45.161174  
H 38.441583 30.731024 46.181382  
N 40.502311 30.834106 44.319114  
H 40.980534 31.231711 45.129074  
C 39.284138 30.161454 44.297178  
C 41.006650 30.833858 43.063173  
H 41.958574 31.269013 42.797222  
N 40.174818 30.215460 42.230072  
C 39.099689 29.803298 42.990772  
H 38.272550 29.281242 42.538295  
Cl 42.588430 30.524153 40.354154  
Fe 40.408854 29.452956 40.269818  
O 40.601698 29.140769 38.713066  
C 36.483946 29.230610 37.380208

C 36.493062 29.344203 38.917364  
H 37.022208 28.319863 37.087559  
H 37.030658 30.071039 36.940593  
H 35.607042 28.816300 39.280584  
H 36.421369 30.388504 39.234276  
C 37.727860 28.681782 39.529313  
O 38.536098 29.503475 40.190029  
O 37.921993 27.473746 39.425985  
C 35.084326 29.116420 36.705216  
O 35.060532 29.298276 35.451652  
O 34.116033 28.787802 37.437723  
C 42.310381 26.930455 35.210011  
C 42.131385 25.902221 36.041666  
H 43.276386 27.424352 35.145611  
H 41.526281 27.328675 34.573637  
H 42.985296 25.600059 36.644651  
C 39.649793 25.800041 35.595712  
H 39.787246 25.837522 34.508696  
H 38.727138 25.251389 35.796768  
H 39.521277 26.822557 35.962255  
C 41.608959 20.971592 39.841651  
H 40.652030 20.579947 39.479967  
H 42.167414 20.139823 40.286713  
H 41.406258 21.692920 40.642453  
C 42.410227 21.633125 38.707237  
C 43.801817 22.063613 39.225534  
H 44.386149 22.567520 38.448997  
H 44.377872 21.192978 39.555717  
H 43.708802 22.745219 40.078864  
C 38.839858 22.246985 35.786939  
N 39.793675 22.931348 35.711946  
C 41.032936 23.662842 35.725721  
H 41.359134 23.746157 34.683317  
C 40.843748 25.130447 36.292022  
C 40.582419 25.084478 37.831266  
H 39.570127 24.690967 37.977564  
H 40.568212 26.116557 38.196936  
C 41.564532 24.214550 38.657236  
H 41.204937 24.181761 39.692886  
H 42.563403 24.669005 38.689240  
C 41.612522 22.815737 38.043769  
C 42.076957 22.886594 36.562180  
H 40.577020 22.452503 38.004047  
H 42.999602 23.478843 36.486623

C 42.546594 20.769960 37.468997  
N 42.924194 19.465495 37.238344  
C 42.967585 19.281210 35.858545  
C 43.249505 18.125812 35.121433  
C 43.241154 18.218350 33.731875  
C 42.959959 19.439686 33.085457  
C 42.670315 20.587544 33.813850  
C 42.657177 20.526195 35.219826  
C 42.376871 21.441785 36.285735  
H 42.902895 18.702173 37.918956  
H 43.459654 17.186866 35.621077  
H 43.458458 17.335632 33.138156  
H 42.977098 19.487472 32.000303  
H 42.455101 21.522608 33.303127  
H 43.218502 25.557752 43.910267  
H 40.544567 35.321091 38.508272  
H 38.716651 29.024746 46.061531

<sup>3</sup>TS<sub>H</sub>

C 43.373003 25.138918 43.102646  
H 44.331658 25.437998 42.670100  
H 43.323457 24.047824 43.033501  
N 40.946428 25.333359 42.291499  
H 40.563595 24.481445 42.713951  
C 42.256907 25.792287 42.346940  
C 40.217909 26.207806 41.562569  
H 39.167738 26.108649 41.336033  
N 40.992233 27.194734 41.141769  
C 42.259451 26.954470 41.619115  
H 43.076125 27.626084 41.401333  
C 40.159861 34.416649 39.031352  
H 39.561474 34.780608 39.877803  
H 39.506287 33.830034 38.370538  
O 41.261602 33.646100 39.469822  
H 41.001600 32.714995 39.520984  
C 38.417690 29.794003 45.262838  
H 37.360220 29.676142 45.011144  
H 38.500552 30.698728 45.873793  
N 40.452849 30.577803 43.937603  
H 40.940696 31.044761 44.696453  
C 39.236798 29.910674 44.017828  
C 40.927905 30.448262 42.675932  
H 41.869221 30.855217 42.339659  
N 40.081290 29.744900 41.933220

C 39.024227 29.411749 42.758588  
H 38.198334 28.822917 42.388885  
Cl 42.491709 30.178593 39.949211  
Fe 40.395607 28.806870 40.036946  
O 40.813863 27.975241 38.523911  
C 36.525563 29.213637 37.295998  
C 36.555949 29.300564 38.833490  
H 37.101270 28.339302 36.961538  
H 37.032051 30.088348 36.877535  
H 35.825842 28.604858 39.243637  
H 36.270575 30.312675 39.143918  
C 37.922768 28.986840 39.417423  
O 38.891844 29.821708 39.219240  
O 38.141384 27.939748 40.082468  
C 35.115379 29.072855 36.648959  
O 35.065179 29.269598 35.398138  
O 34.165244 28.727863 37.397720  
C 42.305747 27.109250 35.113152  
C 42.109870 26.250199 36.113376  
H 43.275383 27.579181 34.972944  
H 41.528295 27.395617 34.411667  
H 42.951256 26.046774 36.772382  
C 39.596492 26.214876 35.807918  
H 39.668016 26.216576 34.715294  
H 38.672916 25.694866 36.076250  
H 39.528869 27.249300 36.154498  
C 41.500707 21.368551 39.993820  
H 40.530018 21.010537 39.634493  
H 42.032279 20.515959 40.431707  
H 41.324754 22.093121 40.798191  
C 42.320557 21.999463 38.854970  
C 43.729196 22.375336 39.366910  
H 44.330377 22.852651 38.586743  
H 44.269223 21.482626 39.698808  
H 43.665595 23.064154 40.217045  
C 38.757928 22.625369 35.956569  
N 39.703980 23.322331 35.880887  
C 40.949358 24.038210 35.885884  
H 41.260129 24.136015 34.839183  
C 40.810109 25.528353 36.456080  
C 40.638471 25.509995 37.997417  
H 39.602333 25.264121 38.256421  
H 40.732068 26.747569 38.356980  
C 41.618046 24.628841 38.785869



H 41.327724 24.616513 39.838505  
H 42.641020 25.020744 38.746363  
C 41.564652 23.210794 38.187294  
C 41.998102 23.243214 36.696119  
H 40.511751 22.901301 38.181701  
H 42.931479 23.814478 36.591419  
C 42.423170 21.123551 37.621572  
N 42.797423 19.814807 37.407156  
C 42.860808 19.617353 36.031617  
C 43.177641 18.458551 35.309233  
C 43.195880 18.541404 33.917751  
C 42.908180 19.752452 33.255577  
C 42.587443 20.901882 33.970462  
C 42.551101 20.854443 35.376160  
C 42.260068 21.785222 36.431183  
H 42.781395 19.054769 38.092506  
H 43.396471 17.522701 35.815784  
H 43.442457 17.658767 33.335577  
H 42.949583 19.788241 32.170201  
H 42.371215 21.829142 33.445691  
H 43.342940 25.354080 44.170761  
H 40.523869 35.294847 38.498124  
H 38.727550 28.984700 45.923958

**<sup>3</sup>Int5**

C 43.296242 25.313181 42.952765  
H 44.266030 25.577450 42.522808  
H 43.180528 24.233294 42.824311  
N 40.885627 25.644476 42.150199  
H 40.492035 24.778164 42.525103  
C 42.204915 26.068386 42.252700  
C 40.178798 26.612664 41.518550  
H 39.121731 26.562789 41.303152  
N 40.968937 27.628609 41.206732  
C 42.230485 27.300996 41.647313  
H 43.064572 27.974432 41.511934  
C 40.228448 34.440096 39.040070  
H 39.593846 34.782579 39.869246  
H 39.624975 33.795995 38.386201  
O 41.374444 33.766383 39.514786  
H 41.210597 32.812600 39.570074  
C 38.374284 29.826807 45.453089  
H 37.327958 29.695472 45.166059  
H 38.409860 30.679577 46.137980

N 40.413482 30.777141 44.241087  
H 40.885386 31.190272 45.045597  
C 39.209115 30.079928 44.244124  
C 40.902871 30.774163 42.981401  
H 41.840946 31.223165 42.690656  
N 40.068273 30.131813 42.169230  
C 39.014683 29.698843 42.944964  
H 38.217588 29.110205 42.516648  
Cl 42.474936 30.716985 40.263807  
Fe 40.373421 29.459458 40.262529  
O 40.792044 28.870827 38.640259  
C 36.550103 29.390945 37.415919  
C 36.541518 29.647881 38.938800  
H 37.181544 28.518339 37.194866  
H 37.017991 30.242307 36.913369  
H 35.882336 28.916106 39.406604  
H 36.140035 30.647777 39.138643  
C 37.932616 29.545219 39.547628  
O 38.729403 30.549125 39.558807  
O 38.349318 28.441851 40.022631  
C 35.159654 29.124644 36.756372  
O 35.113692 29.253814 35.497240  
O 34.225024 28.754625 37.513403  
C 42.105251 26.884984 35.144693  
C 41.979666 25.888822 36.024716  
H 43.047377 27.418129 35.046606  
H 41.297226 27.217067 34.500455  
H 42.844967 25.644415 36.637323  
C 39.480473 25.711491 35.656091  
H 39.569114 25.723635 34.564690  
H 38.575473 25.159186 35.916941  
H 39.365755 26.746021 35.994822  
C 41.525189 20.914700 39.877937  
H 40.582586 20.497864 39.507209  
H 42.102887 20.097475 40.324842  
H 41.297370 21.627299 40.679872  
C 42.320039 21.604303 38.754994  
C 43.693080 22.065863 39.293665  
H 44.276997 22.587856 38.528819  
H 44.283292 21.205867 39.626645  
H 43.573847 22.738745 40.150393  
C 38.766874 22.170175 35.790261  
N 39.715151 22.862478 35.733518  
C 40.941541 23.609128 35.753978

H 41.281109 23.692626 34.714945  
C 40.713904 25.075155 36.319921  
C 40.534821 25.024831 37.827619  
H 39.764564 25.649922 38.272050  
H 40.136783 28.197557 38.395464  
C 41.398904 24.164281 38.713618  
H 40.959202 24.115359 39.716373  
H 42.406909 24.596591 38.835877  
C 41.494708 22.764344 38.085229  
C 41.985051 22.860930 36.612001  
H 40.472213 22.372840 38.029549  
H 42.892722 23.480944 36.568359  
C 42.493401 20.752541 37.514009  
N 42.892573 19.455407 37.283488  
C 42.949990 19.275671 35.903900  
C 43.250974 18.125060 35.165998  
C 43.247890 18.219228 33.776661  
C 42.954424 19.437678 33.130290  
C 42.647184 20.580502 33.859301  
C 42.628658 20.517920 35.265049  
C 42.328441 21.426713 36.331699  
H 42.872291 18.688736 37.961819  
H 43.467782 17.188474 35.667240  
H 43.478324 17.339841 33.183246  
H 42.976714 19.486093 32.045085  
H 42.422969 21.513114 33.347662  
H 43.296787 25.459365 44.032902  
H 40.554962 35.325583 38.494756  
H 38.707993 28.977830 46.049698

<sup>3</sup>TS<sub>OH</sub>

C 43.345742 25.133212 43.127511  
H 44.295097 25.438442 42.679156  
H 43.295888 24.043024 43.046704  
N 40.904747 25.329292 42.373921  
H 40.530688 24.475074 42.798394  
C 42.213678 25.792812 42.402947  
C 40.154819 26.215853 41.684422  
H 39.098484 26.115220 41.487496  
N 40.912978 27.213075 41.264512  
C 42.192731 26.970221 41.699063  
H 42.997963 27.652822 41.471996  
C 40.191931 34.375984 39.026244  
H 39.612883 34.726613 39.892057

H 39.523430 33.796328 38.373651  
O 41.309363 33.607661 39.419696  
H 41.061969 32.672740 39.487844  
C 38.372041 29.788210 45.307047  
H 37.310792 29.656902 45.078614  
H 38.455295 30.691195 45.920676  
N 40.374012 30.577709 43.932067  
H 40.880264 31.044203 44.678479  
C 39.157105 29.918542 44.041658  
C 40.815852 30.449122 42.657283  
H 41.751231 30.849911 42.298753  
N 39.947311 29.752542 41.932866  
C 38.908429 29.427051 42.786050  
H 38.066971 28.849856 42.435778  
Cl 42.365387 30.212956 39.936202  
Fe 40.262730 28.704915 40.087108  
O 40.686291 27.682106 38.644574  
C 36.468930 29.454528 37.281879  
C 36.509221 29.368605 38.815337  
H 37.146857 28.706561 36.848014  
H 36.846275 30.428353 36.950319  
H 35.815866 28.598787 39.150312  
H 36.166231 30.317927 39.247278  
C 37.879191 29.056626 39.388415  
O 38.905363 29.757037 39.040452  
O 38.040825 28.105654 40.207053  
C 35.079794 29.201615 36.625861  
O 35.037649 29.362385 35.369422  
O 34.141380 28.823323 37.371899  
C 41.636828 27.095290 34.885514  
C 41.585668 26.274631 35.937142  
H 42.542175 27.654830 34.666373  
H 40.803821 27.248480 34.205963  
H 42.466425 26.196935 36.570450  
C 39.081150 25.923867 35.729588  
H 39.120892 25.848545 34.637697  
H 38.233627 25.324348 36.069654  
H 38.892854 26.968710 35.990733  
C 41.417010 21.446263 40.036045  
H 40.480462 20.998311 39.686541  
H 42.017379 20.651150 40.493073  
H 41.181339 22.172911 40.822802  
C 42.184130 22.110896 38.879886  
C 43.561109 22.605575 39.376404

H 44.126172 23.097346 38.578516  
H 44.164404 21.766510 39.738019  
H 43.447154 23.319742 40.199803  
C 38.635791 22.311066 35.953134  
N 39.499547 23.106361 35.877539  
C 40.673917 23.931795 35.849186  
H 40.970766 24.019618 34.798098  
C 40.386985 25.429237 36.374774  
C 40.296010 25.485156 37.896925  
H 39.333798 25.740838 38.321499  
H 40.359926 28.148424 37.857273  
C 41.265171 24.682510 38.732491  
H 40.936400 24.677215 39.773170  
H 42.263177 25.142973 38.722169  
C 41.343131 23.242748 38.172901  
C 41.788289 23.263553 36.683928  
H 40.320595 22.846918 38.162474  
H 42.669515 23.910953 36.562948  
C 42.352685 21.206963 37.674396  
N 42.790495 19.911475 37.505634  
C 42.864859 19.670846 36.138119  
C 43.232370 18.501354 35.458892  
C 43.253875 18.534333 34.064848  
C 42.917346 19.707754 33.359738  
C 42.542783 20.866750 34.032661  
C 42.502336 20.869967 35.439346  
C 42.162708 21.821106 36.462924  
H 42.777363 19.168414 38.209920  
H 43.487275 17.593948 35.999276  
H 43.539803 17.642590 33.515280  
H 42.961164 19.706011 32.273838  
H 42.288272 21.762857 33.472193  
H 43.333016 25.336988 44.198202  
H 40.541121 35.263109 38.497904  
H 38.705454 28.980930 45.959121

<sup>3</sup>TS<sub>Cl</sub>

C 43.171189 25.180558 43.020077  
H 44.067987 25.535911 42.504501  
H 43.180529 24.088287 42.946828  
N 40.683313 25.185585 42.369777  
H 40.369914 24.315968 42.812692  
C 41.950760 25.750967 42.364589  
C 39.856147 25.988316 41.664678

H 38.810263 25.777677 41.498869  
N 40.517650 27.017034 41.175060  
C 41.816214 26.888854 41.621578  
H 42.578860 27.597130 41.344486  
C 40.101396 34.424514 39.030905  
H 39.531487 34.815909 39.883134  
H 39.415140 33.870331 38.377158  
O 41.150769 33.571007 39.465465  
H 40.771706 32.682581 39.513202  
C 38.518645 29.861950 45.182100  
H 37.460783 29.772103 44.918575  
H 38.619415 30.769999 45.786717  
N 40.602439 30.514728 43.821316  
H 41.130996 30.960216 44.564821  
C 39.342116 29.939042 43.930499  
C 41.022492 30.359953 42.536397  
H 41.981921 30.719388 42.193795  
N 40.110100 29.732934 41.808304  
C 39.058012 29.478756 42.671434  
H 38.173103 28.967962 42.325916  
Cl 42.039283 27.853434 38.759395  
Fe 39.924334 28.624982 39.831530  
O 39.463731 28.170684 38.157520  
C 36.335313 29.619095 37.394492  
C 36.246146 29.888436 38.912089  
H 36.990922 28.756923 37.210158  
H 36.821035 30.468961 36.907117  
H 35.552583 29.171061 39.354985  
H 35.866149 30.899602 39.087334  
C 37.632972 29.752173 39.524938  
O 38.509476 30.629454 39.367036  
O 37.927605 28.621534 40.104815  
C 35.002611 29.285147 36.672313  
O 35.019724 29.384075 35.409264  
O 34.049091 28.885613 37.387256  
C 42.161097 27.131604 34.985268  
C 42.188262 26.204479 35.940205  
H 43.077455 27.625955 34.676496  
H 41.246782 27.459283 34.501981  
H 43.146204 25.957389 36.394825  
C 39.650112 26.032515 36.036289  
H 39.572433 25.899097 34.951290  
H 38.814502 25.498311 36.495870  
H 39.550229 27.088777 36.267963

|                              |           |           |           |    |           |           |           |
|------------------------------|-----------|-----------|-----------|----|-----------|-----------|-----------|
| C                            | 41.520208 | 21.206022 | 39.970326 | H  | 44.279818 | 25.524665 | 42.624110 |
| H                            | 40.551630 | 20.899774 | 39.560225 | H  | 43.239876 | 24.149126 | 42.948429 |
| H                            | 42.000210 | 20.314118 | 40.390213 | N  | 40.900851 | 25.490413 | 42.263701 |
| H                            | 41.341363 | 21.902870 | 40.797929 | H  | 40.518672 | 24.630042 | 42.664210 |
| C                            | 42.409233 | 21.845872 | 38.886972 | C  | 42.211043 | 25.945553 | 42.347790 |
| C                            | 43.821046 | 22.112364 | 39.450855 | C  | 40.179375 | 26.411792 | 41.587028 |
| H                            | 44.466463 | 22.593264 | 38.709242 | H  | 39.125666 | 26.320183 | 41.371971 |
| H                            | 44.301220 | 21.173673 | 39.746098 | N  | 40.949397 | 27.430183 | 41.223328 |
| H                            | 43.775044 | 22.757795 | 40.334986 | C  | 42.214521 | 27.149745 | 41.690298 |
| C                            | 38.870864 | 22.575038 | 36.090306 | H  | 43.028987 | 27.835572 | 41.516784 |
| N                            | 39.831847 | 23.250072 | 36.005887 | C  | 40.122568 | 34.383518 | 39.051607 |
| C                            | 41.085640 | 23.957486 | 35.980078 | H  | 39.565414 | 34.764223 | 39.918986 |
| H                            | 41.355554 | 24.048867 | 34.921973 | H  | 39.424860 | 33.828321 | 38.408555 |
| C                            | 40.993942 | 25.467477 | 36.538017 | O  | 41.204611 | 33.562850 | 39.442960 |
| C                            | 41.158818 | 25.603446 | 38.067941 | H  | 40.894277 | 32.649749 | 39.534888 |
| H                            | 40.335914 | 26.080345 | 38.573554 | C  | 38.387444 | 29.835449 | 45.529387 |
| H                            | 38.565355 | 27.812294 | 38.233178 | H  | 37.337273 | 29.708308 | 45.254436 |
| C                            | 41.945151 | 24.548478 | 38.844470 | H  | 38.435310 | 30.683583 | 46.218288 |
| H                            | 41.626156 | 24.571064 | 39.890105 | N  | 40.416120 | 30.759522 | 44.256343 |
| H                            | 43.020241 | 24.773780 | 38.849733 | H  | 40.928905 | 31.166071 | 45.038004 |
| C                            | 41.739856 | 23.133017 | 38.245471 | C  | 39.200713 | 30.088368 | 44.306861 |
| C                            | 42.136864 | 23.140849 | 36.745852 | C  | 40.848857 | 30.740646 | 42.966705 |
| H                            | 40.664221 | 22.917559 | 38.272287 | H  | 41.788440 | 31.169743 | 42.646360 |
| H                            | 43.082827 | 23.686865 | 36.616827 | N  | 39.975102 | 30.119174 | 42.189676 |
| C                            | 42.495367 | 20.996272 | 37.634205 | C  | 38.949577 | 29.716532 | 43.013285 |
| N                            | 42.831876 | 19.679948 | 37.396870 | H  | 38.106828 | 29.158522 | 42.629790 |
| C                            | 42.883753 | 19.500622 | 36.018398 | Cl | 42.363162 | 30.100742 | 39.967848 |
| C                            | 43.172519 | 18.344349 | 35.280044 | Fe | 40.231745 | 29.050938 | 40.269548 |
| C                            | 43.180356 | 18.442236 | 33.889926 | O  | 40.119438 | 26.650578 | 38.101354 |
| C                            | 42.908291 | 19.666367 | 33.245518 | C  | 36.538742 | 29.474853 | 37.228903 |
| C                            | 42.619093 | 20.814549 | 33.976645 | C  | 36.627753 | 29.415193 | 38.763803 |
| C                            | 42.598787 | 20.754688 | 35.383198 | H  | 37.210542 | 28.720315 | 36.795401 |
| C                            | 42.345736 | 21.679029 | 36.456194 | H  | 36.902396 | 30.446075 | 36.876325 |
| H                            | 42.823056 | 18.909421 | 38.068820 | H  | 36.073289 | 28.547401 | 39.121119 |
| H                            | 43.378063 | 17.399287 | 35.774417 | H  | 36.162024 | 30.311898 | 39.189335 |
| H                            | 43.404961 | 17.561640 | 33.295443 | C  | 38.046853 | 29.320261 | 39.278648 |
| H                            | 42.937512 | 19.713430 | 32.159933 | O  | 38.896402 | 30.256115 | 39.193298 |
| H                            | 42.413240 | 21.749787 | 33.462079 | O  | 38.446910 | 28.231479 | 39.863618 |
| H                            | 43.220079 | 25.385072 | 44.089586 | C  | 35.133935 | 29.188174 | 36.613620 |
| H                            | 40.504754 | 35.286864 | 38.500132 | O  | 35.047233 | 29.371938 | 35.363544 |
| H                            | 38.782222 | 29.051346 | 45.861449 | O  | 34.237894 | 28.758288 | 37.384184 |
|                              |           |           |           | C  | 41.897403 | 26.987224 | 34.877698 |
| <sup>3</sup> P <sub>OH</sub> |           |           |           | C  | 41.747350 | 26.101237 | 35.863094 |
| C                            | 43.320835 | 25.234286 | 43.061626 | H  | 42.828917 | 27.536580 | 34.765185 |

H 41.120122 27.205568 34.151774  
H 42.585490 25.961940 36.542322  
C 39.272897 25.826711 35.422752  
H 39.380157 25.768293 34.334463  
H 38.374221 25.266626 35.696638  
H 39.124065 26.872411 35.702296  
C 41.438488 21.345882 39.917550  
H 40.505854 20.895273 39.560896  
H 42.026904 20.557734 40.401552  
H 41.191378 22.087819 40.686410  
C 42.226189 21.985960 38.762742  
C 43.596055 22.494966 39.272752  
H 44.174092 22.967175 38.472025  
H 44.193553 21.665019 39.664755  
H 43.468786 23.230748 40.075276  
C 38.700729 22.221764 35.781306  
N 39.592348 22.982636 35.688897  
C 40.786417 23.783593 35.670331  
H 41.117370 23.835660 34.626590  
C 40.507383 25.266450 36.153578  
C 40.229105 25.286911 37.697530  
H 39.261229 24.781559 37.834172  
H 39.328037 26.793877 38.640425  
C 41.272648 24.527114 38.555956  
H 40.922822 24.543575 39.594117  
H 42.233101 25.054889 38.541900  
C 41.391254 23.098584 38.025473  
C 41.868775 23.108218 36.545692  
H 40.375785 22.682957 37.998198  
H 42.758816 23.744315 36.437051  
C 42.411046 21.065050 37.573622  
N 42.837291 19.764257 37.425629  
C 42.918661 19.504823 36.061849  
C 43.270885 18.321830 35.399909  
C 43.292691 18.334948 34.005878  
C 42.974178 19.502802 33.284358  
C 42.619357 20.677557 33.939172  
C 42.574343 20.698203 35.344848  
C 42.237029 21.663585 36.352036  
H 42.814783 19.032320 38.141343  
H 43.511940 17.420116 35.954643  
H 43.564936 17.430074 33.471461  
H 43.015773 19.484347 32.199140  
H 42.381564 21.568427 33.363481

H 43.315920 25.401192 44.138744  
H 40.504800 35.253051 38.516930  
H 38.719315 28.978292 46.115228

<sup>3</sup>P<sub>Cl</sub>

C 43.380054 25.245533 43.092340  
H 44.319331 25.601089 42.660242  
H 43.387494 24.156648 42.988842  
N 41.030009 25.143712 42.129946  
H 40.749576 24.234674 42.509097  
C 42.206042 25.838279 42.371744  
C 40.182515 25.958350 41.468147  
H 39.208731 25.678749 41.098614  
N 40.740749 27.141518 41.262170  
C 41.999933 27.079817 41.821246  
H 42.681977 27.913906 41.776000  
C 39.893114 34.462636 39.172797  
H 39.587334 34.945461 40.113893  
H 38.983189 34.106623 38.673602  
O 40.740897 33.350120 39.401322  
H 40.138425 32.576420 39.391298  
C 38.427651 29.875385 45.428411  
H 37.363132 29.778719 45.197632  
H 38.539978 30.754529 46.070412  
N 40.468031 30.562263 44.016222  
H 41.023149 30.997347 44.748689  
C 39.201201 30.012049 44.157387  
C 40.850675 30.408429 42.717630  
H 41.800124 30.762459 42.339723  
N 39.899768 29.804831 42.021433  
C 38.866638 29.575337 42.904902  
H 37.952207 29.096632 42.585591  
Cl 42.325060 27.008615 38.115988  
Fe 39.565752 28.542698 40.388722  
O 39.024372 27.188625 39.287529  
C 36.271544 30.176060 37.265127  
C 36.271934 30.641270 38.733587  
H 37.015961 29.373014 37.156712  
H 36.621125 31.004300 36.640301  
H 35.672403 29.937991 39.316623  
H 35.825680 31.634886 38.820073  
C 37.710832 30.670414 39.268649  
O 38.435542 31.676028 39.160181  
O 38.062384 29.521721 39.755581

|   |           |           |           |   |           |           |           |
|---|-----------|-----------|-----------|---|-----------|-----------|-----------|
| C | 34.962633 | 29.602928 | 36.645410 | H | 40.491714 | 25.622864 | 38.458769 |
| O | 34.963946 | 29.525733 | 35.376667 | H | 38.231976 | 27.523968 | 38.843973 |
| O | 34.055395 | 29.205078 | 37.418975 | C | 42.245879 | 24.325005 | 38.576206 |
| C | 41.535002 | 27.036889 | 34.662091 | H | 42.120878 | 24.444378 | 39.657532 |
| C | 41.871340 | 25.990031 | 35.414870 | H | 43.306572 | 24.483303 | 38.358253 |
| H | 42.269404 | 27.539114 | 34.040616 | C | 41.839275 | 22.944053 | 38.078357 |
| H | 40.537170 | 27.462090 | 34.650008 | C | 42.122726 | 22.917259 | 36.551021 |
| H | 42.901202 | 25.633848 | 35.382122 | H | 40.754597 | 22.830276 | 38.198541 |
| C | 39.505495 | 25.758434 | 36.255595 | H | 43.048662 | 23.479107 | 36.346041 |
| H | 39.137476 | 25.699343 | 35.226855 | C | 42.506264 | 20.787225 | 37.475596 |
| H | 38.834936 | 25.166029 | 36.880326 | N | 42.847681 | 19.474200 | 37.245694 |
| H | 39.445169 | 26.789588 | 36.611869 | C | 42.887796 | 19.285853 | 35.867021 |
| C | 41.555753 | 21.072266 | 39.824134 | C | 43.167199 | 18.127870 | 35.132277 |
| H | 40.565624 | 20.814894 | 39.433076 | C | 43.171316 | 18.222610 | 33.743151 |
| H | 41.989976 | 20.165495 | 40.259290 | C | 42.900674 | 19.444784 | 33.094062 |
| H | 41.425266 | 21.794945 | 40.639082 | C | 42.610843 | 20.593636 | 33.821266 |
| C | 42.465299 | 21.644922 | 38.719468 | C | 42.590820 | 20.532338 | 35.226299 |
| C | 43.888802 | 21.859886 | 39.281749 | C | 42.334248 | 21.457710 | 36.291894 |
| H | 44.562993 | 22.288033 | 38.533594 | H | 42.844527 | 18.715196 | 37.932843 |
| H | 44.321112 | 20.907822 | 39.605483 | H | 43.366605 | 17.186669 | 35.632511 |
| H | 43.873125 | 22.527997 | 40.150215 | H | 43.388327 | 17.338739 | 33.151731 |
| C | 38.823713 | 22.300392 | 36.125717 | H | 42.931104 | 19.491745 | 32.009063 |
| N | 39.758300 | 23.001377 | 35.984377 | H | 42.407675 | 21.529868 | 33.306715 |
| C | 41.002533 | 23.709175 | 35.849083 | H | 43.339509 | 25.418176 | 44.167801 |
| H | 41.187062 | 23.758086 | 34.770576 | H | 40.383515 | 35.247832 | 38.597438 |
| C | 40.947389 | 25.229483 | 36.357698 | H | 38.739953 | 29.033334 | 46.046054 |
| C | 41.395187 | 25.409056 | 37.884530 |   |           |           |           |

## References

- (1) Yamaguchi, K.; Jensen, F.; Dorigo, A.; Houk, K. N. *Chem Phys Lett* **1988**, *149*, 537.
